# Supplementary material
Source: PubMed Central journal article supplement (PMC7124891)
Supplement: EMS85240-supplement-Supplemental_Information.pdf [file EMS85240-supplement-Supplemental_Information.pdf]

## **SUPPLEMENTAL INFORMATION**

### **Preclinical evaluation of a novel SHIP1 phosphatase activator for inhibition of PI3K signaling in malignant B cells**

Elizabeth Lemm\*, Beatriz Valle-Argos\*, Lindsay D. Smith, Johanna Richter, Yohannes Gebreselassie, Matthew Carter, Jana Karolova, Michael Svaton, Karel Helman, Nicola Weston-Bell, Laura I Karydis, Chris T Williamson, Georg Lenz, Jeremy D Pettigrew, Curtis Harwig, Freda K Stevenson, Mark S Cragg, Francesco Forconi, Andrew J Steele, Jennifer L Cross, Lloyd F Mackenzie, Pavel Klener, Graham Packham

\*These authors contributed equally to this work

## **Supplementary Methods**

### **Microscopy**

CLL samples were treated with soluble goat F(ab')<sub>2</sub> anti-IgM for 30 minutes or left untreated as a control. 1x10<sup>6</sup> cells were fixed and permeabilized with acetone and embedded in 2% (w/v) low melting temperature agarose (Merck). The agarose blocks containing fixed cells were incubated with 4% (v/v) fetal bovine serum, rabbit anti-phosphorylated SHIP1 (Y<sup>1022</sup>) (Cell Signaling Technology), then donkey anti-rabbit Alexa488 and/or anti-goat Alexa568-conjugated secondary antibodies (Life Technologies). Cells were additionally stained with 4',6-diamidino-2-phenylindole (DAPI; Sigma). Agarose gels were mounted with Mowiol (Sigma) and images collected using either a Leica CTR 5000 microscope coupled to a Leica DFC300FX microscope camera or a Leica CTR6500 microscope coupled to a Leica TCS-SP5 digital confocal system.

### **Annexin V/propidium iodide staining**

Cells (1x10<sup>6</sup>) were washed in phosphate buffered saline and resuspended in 300 µl of annexin V staining buffer (10 mM HEPES HCl (pH 7.4), 140 mM NaCl, 2.5 mM CaCl<sub>2</sub>) supplemented with 2.5 µg/ml fluorescein isothiocyanate-labelled annexin V (Protein Core Facility, University of Southampton) and 12.5 µM propidium iodide (Invitrogen). Cells were incubated at room temperature in the dark for 15 minutes before analysis by flow cytometry (Canto II system, BD Biosciences). Unstained cells were used to set gates for identification of annexin V/propidium iodide negative and positive cells.

### **Characterization of PDX models - whole exome sequencing**

PDXs were derived as previously described (1). Primary lymphoma cells were obtained from patients with DLBCL according to the Declaration of Helsinki. The experiment was approved by the Ethics Committee of the General University Hospital Prague under number 63/16.

Germline, parental tumor and PDX-derived DNA were sequenced using a NextSeq 500 (Illumina) instrument according to manufacturer's protocols. Sequencing libraries were prepared using

SureSelectXT Human All Exon V6+UTR kit (Agilent Technologies) or by Atlas Biolabs with libraries prepared using Nimblegen SeqCap ERZ Human Exome Library v 2.0 (Roche Nimblegen) on the HiSeq 2000 (Illumina) instrument.

Sequence reads from PDX samples were first aligned against the mouse reference genome mm10 combined with the human reference genome hg19 and murine reads were filtered out from further analysis by a custom script to reduce risk of contamination. Remaining reads were then aligned against the human reference genome hg19. All alignments were performed by BWA (2). Genomic variants were called with samtools and VarScan 2 (3,4). Variant annotation was performed using SnpEff (5). Only nonsynonymous variants in gene coding regions with coverage of at least 10 reads with mapping quality and base quality higher than 20 in all related samples were compared together based on their frequency. Variants present in the relevant patient's germline DNA at a frequency  $>0.05$  were excluded from analysis in all cases. We compared variants with an allele fraction  $\geq 0.2$  in at least one of the compared samples that were present in at least 3 reads in both patient's sample and derived PDX samples. All variant filtering was done in RStudio (<http://www.R-project.org>; <http://www.rstudio.com>) and frequencies and counts of variants were plotted using the ggplot2 library (<http://ggplot2.org>). These variants were then manually reviewed in Integrative Genomics Viewer (<http://www.broadinstitute.org/igv>) and clear sequencing artefacts or variants present but not called in the germline sample were also excluded. A list of 573 genes of special interest was created based on recent publications of frequently mutated genes in DLBCL samples (6-13) and variants present in these genes were highlighted.

Copy number variants were predicted using CNVkit (14) with normalization to pooled normal samples sequenced on the same instrument using the same library preparation kits. Inferred segmental changes were calculated using the fused lasso method (15) and plotted in diagrams for parental tumor and PDX samples.

Downloadable copies of Supplementary Tables 4-6 and the full list of 573 DLBCL-related genes are available at [supplemental-tables and genelist](#).

## **Statistics**

To evaluate *in vivo* drug responses, we plotted graphs showing mean tumour volumes against time for each model (TMD8 cells and three DLBCL PDX). For the purpose of assessing the statistical significance of treatment effectiveness, we calculated the difference between mean tumor volumes in the control and treatment groups, and between each treatment group, for each time point. For the daily time series of these differences in tumor volumes, statistical hypothesis tests of linear trend slopes equality to zero were performed. The Bonferroni correction was used to smooth the significance level for multiple simultaneous hypothesis tests. We assumed that the calculated differences in mean tumor volumes were generated by a process which includes a deterministic linear trend in the form of

$$y_t = \beta_0 + \beta_1 t + \varepsilon_t$$

where  $y_t$  denotes the data-generating stochastic process of the analyzed differences,  $t = 1, 2, \dots, T$  is a time variable,  $T$  signifies the length of the experiment in days, and  $\varepsilon_t$  is the Gaussian IID white noise. We performed a total of 21 statistical hypothesis tests about  $\beta_1 = 0$  across the four experiments and the Bonferroni correction of 10% and 1% simultaneous significance was used, resulting in individual significance levels of 0.4762% and 0.0476%, respectively.

All other statistical comparisons were performed using Prism 6 software (GraphPad Software, La Jolla, CA, USA).

**Supplementary Table 1.** Details of CLL samples used for *in vitro* studies.

| Sample <sup>a</sup> | <i>IGHV</i> status <sup>b</sup> | CLL (% cells) <sup>c</sup> | ZAP70 expression <sup>d</sup> | CD38 expression <sup>d</sup> | CD49d expression <sup>d</sup> | sIgM expression <sup>e</sup> | sIgM signal capacity <sup>f</sup> |
|---------------------|---------------------------------|----------------------------|-------------------------------|------------------------------|-------------------------------|------------------------------|-----------------------------------|
| 110F*               | U                               | 85                         | 56                            | 91                           | 86                            | 527                          | 49                                |
| 164B*               | M                               | 77                         | 2                             | 18                           | 10                            | 28                           | 1                                 |
| 276D                | M                               | 95                         | 0                             | 2                            | 84                            | 784                          | 78                                |
| 279A/279A*          | M                               | 89                         | 1                             | 2                            | 4                             | 28                           | 74                                |
| 281D/281D*          | M                               | 88                         | 1                             | 8                            | 3                             | 7                            | 16                                |
| 348D/348D*          | M                               | 98                         | 1                             | 0                            | 21                            | 53                           | 4                                 |
| 351A                | M                               | 94                         | nd                            | 56                           | nd                            | 10                           | 6                                 |
| 351B                | M                               | 93                         | nd                            | 90                           | nd                            | 29                           | 71                                |
| 368E                | M                               | 97                         | 19                            | 85                           | 1                             | 31                           | 36                                |
| 409C                | U                               | 80                         | 21                            | 47                           | 79                            | 112                          | 60                                |
| 409D                | U                               | 81                         | 23                            | 24                           | 75                            | 99                           | 64                                |
| 409E*               | U                               | 84                         | 16                            | 17                           | 75                            | 95                           | 59                                |
| 452                 | M                               | 61                         | nd                            | 8                            | nd                            | 30                           | 43                                |
| 452B*               | M                               | 89                         | 6                             | 4                            | 40                            | 17                           | 54                                |
| 470D*               | M                               | 88                         | 4                             | 1                            | 6                             | 24                           | 2                                 |
| 475C*               | M                               | 91                         | 5                             | 9                            | 3                             | 12                           | 10                                |
| 482D/482D*          | M                               | 94                         | 4                             | 99                           | 52                            | nd                           | 2                                 |
| 483A                | M                               | 98                         | 1                             | 1                            | 18                            | 65                           | 2                                 |
| 489D*               | M                               | 93                         | 2                             | 0                            | 10                            | 37                           | 32                                |
| 495A                | M                               | 90                         | nd                            | 9                            | nd                            | 58                           | 75                                |
| 498B                | M                               | 79                         | 4                             | 1                            | 18                            | 15                           | 12                                |
| 500F/500F*          | U                               | 89                         | 36                            | 81                           | 2                             | 45                           | 39                                |
| 501B                | U                               | 96                         | 19                            | 90                           | 24                            | 137                          | 52                                |
| 501C                | U                               | 96                         | 35                            | 81                           | nd                            | 77                           | 52                                |
| 511A                | U                               | 96                         | 36                            | 22                           | 3                             | 32                           | 39                                |
| 519C*               | M                               | 95                         | 0                             | 4                            | nd                            | 15                           | 61                                |
| 523C*               | M                               | 83                         | 0                             | 0                            | 1                             | nd                           | 56                                |
| 523H                | M                               | 92                         | 3                             | 2                            | 2                             | 45                           | 39                                |
| 525B*               | M                               | 90                         | 5                             | 0                            | 17                            | 24                           | 19                                |
| 528A                | U                               | 95                         | 60                            | 14                           | nd                            | 132                          | 69                                |
| 528B                | U                               | 91                         | 56                            | 3                            | 25                            | 151                          | 59                                |
| 531B*               | U                               | 97                         | 6                             | 0                            | 17                            | 50                           | 5                                 |
| 541                 | M                               | 86                         | 0                             | 0                            | nd                            | 179                          | 79                                |
| 549                 | M                               | 76                         | 1                             | 6                            | nd                            | 33                           | 22                                |
| 550B                | U                               | 89                         | 2                             | 1                            | 15                            | 130                          | 87                                |
| 551A*               | U                               | 95                         | 21                            | 100                          | 8                             | 129                          | 69                                |
| 560B                | M                               | 84                         | 0                             | 1                            | 14                            | 20                           | 3                                 |
| 567                 | M                               | 86                         | 73                            | 85                           | nd                            | 97                           | 46                                |
| 575B                | M                               | 97                         | 2                             | 1                            | 11                            | 87                           | 64                                |
| 575E                | M                               | 95                         | 0                             | 1                            | 65                            | 99                           | 69                                |
| 580C*               | M                               | 83                         | 0                             | 5                            | 5                             | 16                           | 5                                 |
| 585                 | U                               | 90                         | 39                            | 86                           | nd                            | 133                          | 39                                |
| 585A                | U                               | 95                         | 28                            | 87                           | nd                            | 175                          | 8                                 |
| 588A*               | M                               | 94                         | 5                             | 7                            | nd                            | 30                           | 5                                 |
| 588B                | M                               | 90                         | 3                             | 11                           | 17                            | 34                           | 10                                |

|            |   |    |    |    |    |     |    |
|------------|---|----|----|----|----|-----|----|
| 595A       | U | 95 | 3  | 70 | nd | 26  | 10 |
| 595D/595D* | U | 95 | 4  | 77 | 12 | 36  | 20 |
| 600        | M | 94 | 0  | 0  | nd | 13  | 22 |
| 602        | U | 93 | 0  | 36 | nd | 19  | 24 |
| 604A       | M | 92 | 2  | 0  | nd | 94  | 44 |
| 604B       | M | 88 | 0  | 1  | 14 | 59  | 73 |
| 604E/604E* | M | 87 | 2  | 0  | 13 | 95  | 84 |
| 604G       | M | 89 | 0  | 3  | 4  | 81  | 40 |
| 607        | U | 91 | 23 | 90 | nd | 26  | 60 |
| 609        | M | 88 | 0  | 18 | nd | 25  | 57 |
| 609C       | M | 94 | 0  | 0  | 15 | 53  | 79 |
| 615        | M | 93 | 5  | 8  | nd | 32  | 69 |
| 628A       | U | 97 | 9  | 24 | 10 | 32  | 14 |
| 629B*      | U | 94 | 0  | 14 | 11 | 20  | 19 |
| 629C       | U | 95 | 2  | 17 | 1  | 12  | 6  |
| 635        | U | 87 | 12 | 1  | nd | 67  | 82 |
| 635D/635D* | U | 95 | 2  | 3  | 63 | 50  | 78 |
| 636        | M | 94 | 0  | 0  | nd | 24  | 2  |
| 637        | M | 83 | 2  | 0  | nd | 25  | 17 |
| 640        | M | 87 | 1  | 0  | nd | 53  | 13 |
| 643A       | M | 91 | 0  | 0  | nd | 15  | 25 |
| 643C*      | M | 88 | 1  | 0  | 13 | 31  | 32 |
| 644        | U | 90 | 46 | 26 | nd | 48  | 31 |
| 654        | M | 85 | 0  | 0  | ND | 21  | 36 |
| 657B*      | M | 83 | 0  | 0  | 11 | 18  | 2  |
| 657D       | M | 90 | 2  | 4  | 4  | 6   | 2  |
| 661        | M | 81 | 7  | 1  | nd | 98  | 73 |
| 665        | M | 85 | 0  | 72 | nd | 468 | 68 |
| 668        | U | 92 | 35 | 0  | nd | 71  | 54 |
| 668/668B*  | U | 93 | 9  | 1  | 15 | 88  | 42 |
| 669        | U | 91 | 39 | 3  | nd | 36  | 52 |
| 674B/674B* | U | 85 | 38 | 22 | 27 | 295 | 89 |
| 681        | M | 96 | 0  | 6  | 46 | 212 | 60 |
| 681A       | M | 97 | 2  | 6  | 34 | 185 | 31 |
| 684D       | M | 94 | 5  | 11 | 10 | 33  | 21 |
| 686A       | M | 88 | 23 | 18 | 18 | 70  | 78 |
| 687C*      | U | 79 | 62 | 5  | 81 | 94  | 59 |
| 704        | U | 99 | 35 | 41 | 22 | 31  | 70 |
| 706*       | M | 82 | nd | 5  | 60 | 706 | 86 |
| 707        | M | 82 | 0  | 1  | 13 | 32  | 6  |
| 711*       | U | 80 | 2  | 8  | 17 | 123 | 51 |
| 715        | U | 92 | 4  | 77 | 13 | 145 | 73 |
| 716A       | M | 86 | 1  | 0  | 25 | 35  | 83 |
| 716B*      | M | 88 | 1  | 4  | 4  | 34  | 65 |
| 727/727*   | M | 96 | 0  | 0  | 24 | 52  | 58 |
| 731        | U | 94 | 4  | 5  | 28 | 42  | 19 |
| 732        | U | 91 | 13 | 47 | 34 | 85  | 47 |
| 735A*      | M | 83 | 0  | 5  | 3  | 16  | 21 |
| 739        | U | 98 | 1  | 81 | 10 | 99  | 76 |
| 739A*      | U | 97 | 1  | 77 | 4  | 83  | 75 |

|                   |   |    |    |    |    |     |    |
|-------------------|---|----|----|----|----|-----|----|
| <b>740A</b>       | M | 81 | nd | 5  | 2  | 11  | 26 |
| <b>746A</b>       | M | 83 | 0  | 8  | 10 | 23  | 5  |
| <b>747*</b>       | U | 79 | 1  | 7  | 10 | 247 | 43 |
| <b>754A</b>       | M | 82 | 16 | 1  | 12 | 20  | 10 |
| <b>754B/754B*</b> | M | 86 | 9  | 4  | 5  | 14  | 2  |
| <b>771</b>        | U | 96 | 46 | 38 | 39 | 94  | 73 |
| <b>774A*</b>      | U | 97 | 15 | 5  | 5  | 40  | 25 |
| <b>778*</b>       | U | 86 | 32 | 28 | 84 | 27  | 41 |
| <b>780</b>        | U | 99 | 6  | 86 | 30 | 65  | 81 |
| <b>780A</b>       | U | 99 | 2  | 62 | 18 | 81  | 81 |
| <b>780B</b>       | U | 98 | 30 | 98 | 49 | 47  | 81 |
| <b>791A*</b>      | M | 87 | 5  | 33 | 4  | 47  | 28 |
| <b>794*</b>       | M | 86 | 4  | 4  | 4  | 15  | 2  |
| <b>794A</b>       | M | 86 | 8  | 5  | 3  | 23  | 37 |
| <b>803</b>        | U | 95 | 45 | 25 | 5  | 33  | 30 |
| <b>803B</b>       | U | 93 | 55 | 30 | 5  | 38  | 20 |
| <b>803D</b>       | U | nd | nd | nd | nd | nd  | nd |
| <b>805*</b>       | U | 86 | 6  | 3  | 3  | 41  | 49 |
| <b>807</b>        | M | 93 | 0  | 19 | 4  | 45  | 60 |
| <b>816A*</b>      | U | 80 | 0  | 4  | 93 | 43  | 73 |
| <b>818*</b>       | U | 90 | 2  | 91 | 6  | 59  | 69 |
| <b>822*</b>       | U | 90 | 57 | 91 | 2  | 64  | 28 |
| <b>834</b>        | M | 92 | 11 | 97 | 11 | 155 | 70 |
| <b>882*</b>       | U | 84 | 56 | 84 | 17 | 96  | 34 |
| <b>929</b>        | U | 90 | 25 | 75 | 2  | 134 | 58 |

Diagnosis of CLL was according to the IWCLL-NCI 2008 criteria and the monoclonal B-cell population in the peripheral blood had a typical IgM<sup>+</sup>IgD<sup>+</sup> CLL phenotype in all cases. None of the patients had received any (immuno)chemotherapy, steroids, idelalisib or ibrutinib for the 6 months prior to collection. <sup>a</sup>Where suffix is not shown, this is the first sample obtained from that patient, typically obtained shortly after diagnosis. A, B, C etc. indicate subsequent samples from the same patient. The presence or absence of an asterisk indicates whether the sample was used fresh (Figure 1A, Supplementary Figure 1) or following cryopreservation (all other experiments), respectively, or both. <sup>b</sup>IgHV mutation status (M, mutated; U, unmutated). <sup>c</sup>Percentage of CLL cells. <sup>d</sup>Percentage of ZAP70, CD49d or CD38 positive cells. <sup>e</sup>Mean fluorescence intensity of IgM positive cells. <sup>f</sup>Maximal percentage of cells with increased intracellular calcium following treatment with soluble anti-IgM (16). nd, not done.

1 **Supplementary Table 2.** AQX-435-induced growth inhibition in DLBCL cell lines.

2

| Cell line  | Malignancy <sup>a</sup> | IC <sub>50</sub> (μM) <sup>b</sup> |
|------------|-------------------------|------------------------------------|
| WSU-DLCL2  | GCB-DLBCL               | 1.66                               |
| SU-DHL-4   | GCB-DLBCL               | 2.01                               |
| SU-DHL-6   | GCB-DLBCL               | 4.46                               |
| SU-DHL-5   | GCB-DLBCL               | 2.16                               |
| Toledo     | GCB-DLBCL               | 4.59                               |
| OCI-LY19   | GCB-DLBCL               | 2.40                               |
| KARPAS-422 | GCB-DLBCL               | 2.57                               |
| TMD8       | ABC-DLBCL               | 2.90                               |
| U2932      | ABC-DLBCL               | 2.53                               |
| HBL1       | ABC-DLBCL               | 2.06                               |
| OCI-LY10   | ABC-DLBCL               | 19.1                               |

3

4 <sup>a</sup>ABC-DLBCL, activated B cell-like diffuse large B-cell lymphoma; GCB, germinal center B cell-like  
5 diffuse large B-cell lymphoma. <sup>b</sup>IC<sub>50</sub> values were determined using CellTitre Glo (Promega) in 96-well  
6 plates after 72 hours of drug exposure and using DMSO-treated cells as controls. Data are means  
7 derived from up to 6 individual determinations.

8



9 **Supplementary Table 3.** Features of DLBCL PDX models.

10

| <b>Model</b> | <b>Subtype<sup>a</sup></b> | <b>Tissue</b>     | <b>Features</b>                                                                     | <b>Patient outcome</b>                                                |
|--------------|----------------------------|-------------------|-------------------------------------------------------------------------------------|-----------------------------------------------------------------------|
| VFN-D1       | Non-GCB                    | Lymph node        | Derived at first relapse after failure of obinotuzumab-CHOP-based therapy           | Patient died of refractory lymphoma                                   |
| VFN-D2       | GCB                        | Malignant ascites | Derived at second relapse after failure of rituximab-CHOP and RDHAP-based therapies | Patient died of refractory lymphoma                                   |
| VFN-D3       | Non-GCB                    | Lymph node        | Derived from diagnostic sample                                                      | Patient achieved complete response with R-CHOP and is currently alive |

11

12 <sup>a</sup>Assigned as germinal centre B cell (GCB)-like or non-GCB-like according to the Hans algorithm (17).

13 **Supplementary Table 4.** A complete list of protein coding variants which passed the filtering described in supplementary methods, that were found in both  
 14 the parental tumor samples and the derived PDXs. Variants in genes of special interest based on a list of frequently mutated genes are highlighted in red.  
 15  
 16

**VFN-D1**

| Chr <sup>a</sup> | Position (hg19)  | REF <sup>b</sup>            | ALT <sup>c</sup> | Genesymbol   | AA change <sup>d</sup> | DNA change <sup>e</sup>                    | Transcript         | Patient AF <sup>f</sup> | Patient Depth <sup>g</sup> | PDX AF <sup>f</sup> | PDX Depth <sup>g</sup> |
|------------------|------------------|-----------------------------|------------------|--------------|------------------------|--------------------------------------------|--------------------|-------------------------|----------------------------|---------------------|------------------------|
| chr1             | 156518447        | C                           | G                | IQGAP3       | p.Arg640Pro            | c.1919G>C                                  | NM_178229.4        | 0.355556                | 90                         | 0.350877            | 57                     |
| <b>chr1</b>      | <b>203274876</b> | <b>G</b>                    | <b>A</b>         | <b>BTG2</b>  | <b>p.Glu48Lys</b>      | <b>c.142G&gt;A</b>                         | <b>NM_006763.2</b> | <b>0.4</b>              | <b>20</b>                  | <b>0.478261</b>     | <b>23</b>              |
| chr1             | 231339708        | G                           | A                | TRIM67       | p.Val544Met            | c.1630G>A                                  | NM_001004342.3     | 0.586667                | 75                         | 0.554455            | 101                    |
| chr1             | 37948805         | C                           | T                | ZC3H12A      | p.Arg465*              | c.1393C>T                                  | NM_025079.2        | 0.333333                | 18                         | 0.444444            | 18                     |
| chr10            | 45869806         | G                           | A                | ALOX5        | p.Val27Met             | c.79G>A                                    | NM_000698.3        | 0.415094                | 53                         | 0.467742            | 62                     |
| chr10            | 99160983         | AC                          | A                | RRP12        | p.Gly2fs               | c.5delG                                    | NM_001145114.1     | 0.5                     | 34                         | 0.439024            | 41                     |
| chr11            | 30033718         | G                           | A                | KCNA4        | p.Arg170Cys            | c.508C>T                                   | NM_002233.3        | 0.37931                 | 58                         | 0.4                 | 80                     |
| chr11            | 58979015         | G                           | A                | MPEG1        | p.Leu442Phe            | c.1324C>T                                  | NM_001039396.1     | 0.322581                | 93                         | 0.421053            | 95                     |
| chr11            | 67926195         | G                           | A                | SUV420H1     | p.Arg368Trp            | c.1102C>T                                  | NM_001300907.1     | 0.385965                | 57                         | 0.478873            | 71                     |
| chr11            | 71293674         | A                           | T                | KRTAP5-11    | p.Cys70*               | c.210T>A                                   | NM_001005405.2     | 0.428571                | 91                         | 0.516854            | 89                     |
| <b>chr12</b>     | <b>49422914</b>  | <b>TGAGCCCAGATGAGGGAAAC</b> | <b>T</b>         | <b>KMT2D</b> | <b>p.Arg4721fs</b>     | <b>c.14162_14180delGTTTCCCTCATCTGGGCTC</b> | <b>NM_003482.3</b> | <b>0.333333</b>         | <b>75</b>                  | <b>0.216495</b>     | <b>97</b>              |
| <b>chr12</b>     | <b>49426919</b>  | <b>G</b>                    | <b>A</b>         | <b>KMT2D</b> | <b>p.Gln3857*</b>      | <b>c.11569C&gt;T</b>                       | <b>NM_003482.3</b> | <b>0.376623</b>         | <b>77</b>                  | <b>0.425</b>        | <b>80</b>              |
| chr14            | 91883151         | C                           | T                | CCDC88C      | p.Ser31Asn             | c.92G>A                                    | NM_001080414.3     | 0.75                    | 48                         | 0.842105            | 38                     |
| chr14            | 94517703         | T                           | A                | DDX24        | p.Gln805Leu            | c.2414A>T                                  | NM_020414.3        | 0.411765                | 119                        | 0.523077            | 130                    |
| <b>chr15</b>     | <b>45007641</b>  | <b>T</b>                    | <b>A</b>         | <b>B2M</b>   | <b>p.Tyr30Asn</b>      | <b>c.88T&gt;A</b>                          | <b>NM_004048.2</b> | <b>0.821429</b>         | <b>56</b>                  | <b>0.927273</b>     | <b>55</b>              |
| chr15            | 51839591         | C                           | A                | DMXL2        | p.Leu194Phe            | c.582G>T                                   | NM_001174116.1     | 0.724138                | 29                         | 0.85                | 20                     |
| chr15            | 93486192         | T                           | TA               | CHD2         | p.Tyr316_Ile317fs      | c.947_948insA                              | NM_001042572.2     | 0.397959                | 98                         | 0.449541            | 109                    |
| chr16            | 2813048          | C                           | A                | SRRM2        | p.Pro840His            | c.2519C>A                                  | NM_016333.3        | 0.404255                | 47                         | 0.648148            | 54                     |
| chr16            | 77325368         | G                           | T                | ADAMTS18     | p.Ala1066Glu           | c.3197C>A                                  | NM_199355.2        | 0.306452                | 62                         | 0.352113            | 71                     |
| chr16            | 81819656         | C                           | T                | PLCG2        | p.Ala21Val             | c.62C>T                                    | NM_002661.4        | 0.379747                | 79                         | 0.557143            | 70                     |
| <b>chr17</b>     | <b>40475329</b>  | <b>T</b>                    | <b>A</b>         | <b>STAT3</b> | <b>p.Asp566Val</b>     | <b>c.1697A&gt;T</b>                        | <b>NM_003150.3</b> | <b>0.348148</b>         | <b>135</b>                 | <b>0.402516</b>     | <b>159</b>             |

|               |           |    |   |         |              |            |                |          |     |          |     |
|---------------|-----------|----|---|---------|--------------|------------|----------------|----------|-----|----------|-----|
| chr17         | 42285113  | C  | T | UBTF    | p.Arg623Gln  | c.1868G>A  | NM_001076683.1 | 0.393939 | 66  | 0.436364 | 110 |
| chr17         | 80046084  | G  | A | FASN    | p.Thr898Met  | c.2693C>T  | NM_004104.4    | 0.372093 | 86  | 0.494845 | 97  |
| chr2          | 125547527 | T  | A | CNTNAP5 | p.Leu933*    | c.2798T>A  | NM_130773.3    | 0.433333 | 30  | 0.395349 | 43  |
| chr2          | 182358063 | G  | A | ITGA4   | p.Gly389Arg  | c.1165G>A  | NM_000885.4    | 0.333333 | 72  | 0.462687 | 67  |
| chr2          | 242707170 | C  | T | D2HGDH  | p.Pro317Leu  | c.950C>T   | NM_001287249.1 | 0.333333 | 60  | 0.361702 | 47  |
| chr2          | 26703760  | C  | T | OTOF    | p.Arg566Gln  | c.1697G>A  | NM_001287489.1 | 0.523077 | 65  | 0.416667 | 48  |
| chr2          | 37283727  | GC | G | HEATR5B | p.Ala752fs   | c.2254delG | NM_019024.1    | 0.956522 | 23  | 0.8125   | 16  |
| chr2          | 46770261  | C  | T | RHOQ    | p.Leu26Phe   | c.76C>T    | NM_012249.3    | 0.404762 | 42  | 0.407407 | 27  |
| chr20         | 35060849  | G  | A | DLGAP4  | p.Met243Ile  | c.729G>A   | NM_014902.5    | 0.368421 | 19  | 0.210526 | 19  |
| chr21         | 35147383  | G  | A | ITSN1   | p.Glu523Lys  | c.1567G>A  | NM_001001132.1 | 0.307692 | 52  | 0.42029  | 69  |
| chr22         | 26688908  | G  | A | SEZ6L   | p.Val211Met  | c.631G>A   | NM_001184773.1 | 0.363636 | 22  | 0.466667 | 15  |
| chr3          | 49412923  | A  | C | RHOA    | p.Tyr34Asp   | c.100T>G   | NM_001664.2    | 0.354545 | 110 | 0.459677 | 124 |
| chr4          | 126373626 | C  | T | FAT4    | p.Arg3821*   | c.11461C>T | NM_001291285.1 | 0.362069 | 58  | 0.397059 | 68  |
| chr4          | 134084339 | C  | G | PCDH10  | p.Thr1002Ser | c.3005C>G  | NM_032961.1    | 0.313725 | 51  | 0.5      | 56  |
| chr4          | 159091444 | C  | A | FAM198B | p.Trp322Cys  | c.966G>T   | NM_001031700.2 | 0.470588 | 68  | 0.44186  | 86  |
| chr5          | 16877734  | C  | T | MYO10   | p.Arg35Gln   | c.104G>A   | NM_012334.2    | 0.366972 | 109 | 0.432836 | 134 |
| chr6          | 161160209 | C  | T | PLG     | p.Arg663*    | c.1987C>T  | NM_000301.3    | 0.375635 | 197 | 0.365854 | 205 |
| chr6          | 26093137  | A  | G | HFE     | p.Thr281Ala  | c.841A>G   | NM_000410.3    | 0.836066 | 61  | 0.913043 | 69  |
| chr6          | 37138928  | G  | A | PIM1    | p.Val181Met  | c.541G>A   | NM_001243186.1 | 0.37931  | 29  | 0.625    | 32  |
| chr6          | 37139203  | G  | C | PIM1    | p.Glu272Asp  | c.816G>C   | NM_001243186.1 | 0.37931  | 29  | 0.5      | 46  |
| chr6          | 37140818  | C  | T | PIM1    | p.Tyr309Tyr  | c.927C>T   | NM_001243186.1 | 0.45     | 120 | 0.452991 | 117 |
| chr6_mcf_hap5 | 2703745   | G  | A | HLA-B   | p.Gln204*    | c.610C>T   | NM_005514.6.5  | 0.909091 | 11  | 0.944444 | 18  |
| chr6_qbl_hap6 | 2618175   | C  | T | HLA-B   | p.Gly50Asp   | c.149G>A   | NM_005514.6.2  | 0.8      | 25  | 0.947368 | 38  |
| chr7          | 142565462 | C  | T | EPHB6   | p.Ala324Val  | c.971C>T   | NM_001280794.2 | 0.428571 | 49  | 0.5      | 46  |
| chr8          | 140715058 | G  | A | KCNK9   | p.Arg60Trp   | c.178C>T   | NM_001282534.1 | 0.235849 | 106 | 0.269231 | 104 |
| chr8          | 143569788 | G  | A | BAI1    | p.Trp791*    | c.2372G>A  | NM_001702.2    | 0.558442 | 77  | 0.602273 | 88  |
| chr9          | 113194299 | G  | A | SVEP1   | p.Ala1750Val | c.5249C>T  | NM_153366.3    | 0.463636 | 110 | 0.473684 | 114 |
| chr9          | 113194865 | C  | T | SVEP1   | p.Asp1704Asn | c.5110G>A  | NM_153366.3    | 0.222222 | 135 | 0.426829 | 164 |

|       |           |   |   |           |              |           |                |           |     |          |     |
|-------|-----------|---|---|-----------|--------------|-----------|----------------|-----------|-----|----------|-----|
| chr9  | 138379846 | G | C | PPP1R26   | p.Glu1164Gln | c.3490G>C | NM_014811.3    | 0.522388  | 67  | 0.430769 | 65  |
| chr9  | 139793328 | C | G | TRAF2     | p.Gln46Glu   | c.136C>G  | NM_021138.3    | 0.36      | 50  | 0.522388 | 67  |
| chr9  | 35310565  | G | A | UNC13B    | p.Arg288Gln  | c.863G>A  | NM_006377.3    | 0.464286  | 56  | 0.409091 | 66  |
| chr9  | 39099925  | C | A | CNTNAP3   | p.Gly993Val  | c.2978G>T | NM_033655.3    | 0.462264  | 106 | 0.503546 | 141 |
| chrX  | 24383078  | C | T | SUPT20HL1 | p.Thr734Met  | c.2201C>T | NM_001136234.1 | 0.783784  | 37  | 0.857143 | 42  |
| chrX  | 86087129  | G | A | DACH2     | p.Glu424Lys  | c.1270G>A | NM_001139515.1 | 0.854545  | 55  | 0.966102 | 59  |
| chr11 | 58979177  | G | A | MPEG1     | p.Leu388Phe  | c.1162C>T | NM_001039396.1 | 0.353535  | 99  | 0.45045  | 111 |
| chr20 | 62571739  | C | T | UCKL1     | p.Val453Met  | c.1357G>A | NM_001193379.1 | 0.451613  | 155 | 0.425287 | 174 |
| chr6  | 37139025  | G | A | PIM1      | p.Arg213Lys  | c.638G>A  | NM_001243186.1 | 0.5       | 36  | 0.363636 | 22  |
| chr6  | 37139033  | C | T | PIM1      | p.Pro216Ser  | c.646C>T  | NM_001243186.1 | 0.483871  | 31  | 0.5      | 28  |
| chr6  | 37139063  | G | A | PIM1      | p.Glu226Lys  | c.676G>A  | NM_001243186.1 | 0.486486  | 37  | 0.324324 | 37  |
| chr7  | 112724299 | C | T | GPR85     | p.Val160Met  | c.478G>A  | NM_001146265.1 | 0.339623  | 53  | 0.58     | 50  |
| chr1  | 206858812 | C | T | MAPKAPK2  | p.Gln80*     | c.238C>T  | NM_004759.4    | 0.136364  | 22  | 0.357143 | 14  |
| chr12 | 11803087  | G | A | ETV6      | p.Ser9Asn    | c.26G>A   | NM_001987.4    | 0.438596  | 57  | 0.543478 | 46  |
| chr12 | 11803094  | G | C | ETV6      | p.Lys11Asn   | c.33G>C   | NM_001987.4    | 0.482143  | 56  | 0.533333 | 45  |
| chr12 | 92539304  | G | A | BTG1      | p.Pro3Leu    | c.8C>T    | NM_001731.2    | 0.290323  | 31  | 0.125    | 32  |
| chr2  | 96810609  | C | T | DUSP2     | p.Gly134Asp  | c.401G>A  | NM_004418.3    | 0.34375   | 32  | 0.212121 | 33  |
| chr4  | 115997291 | T | C | NDST4     | p.Asp301Gly  | c.902A>G  | NM_022569.1    | 0.0559441 | 143 | 0.284848 | 165 |
| chr5  | 141059554 | C | T | ARAP3     | p.Gly167Asp  | c.500G>A  | NM_022481.5    | 0.371429  | 35  | 0.380952 | 42  |
| chr6  | 37138549  | G | A | PIM1      | p.Gly119Asp  | c.356G>A  | NM_001243186.1 | 0.241379  | 29  | 0.444444 | 27  |
| chr6  | 37138775  | G | A | PIM1      | p.Glu161Lys  | c.481G>A  | NM_001243186.1 | 0.425     | 40  | 0.441176 | 34  |
| chr9  | 130507352 | C | T | SH2D3C    | p.Ala77Thr   | c.229G>A  | NM_001142531.1 | 0.6       | 15  | 0.571429 | 21  |

17

18

## VFN-D2

| Chr <sup>a</sup> | Position (hg19) | REF <sup>b</sup> | ALT <sup>c</sup> | Genesymbol | AA change <sup>d</sup> | DNA change <sup>e</sup> | Transcript | Patient AF <sup>f</sup> | Patient Depth <sup>g</sup> | PDX AF <sup>f</sup> | PDX Depth <sup>g</sup> |
|------------------|-----------------|------------------|------------------|------------|------------------------|-------------------------|------------|-------------------------|----------------------------|---------------------|------------------------|
|------------------|-----------------|------------------|------------------|------------|------------------------|-------------------------|------------|-------------------------|----------------------------|---------------------|------------------------|

|       |           |   |          |          |                     |                       |                |          |     |          |     |
|-------|-----------|---|----------|----------|---------------------|-----------------------|----------------|----------|-----|----------|-----|
| chr1  | 10725422  | G | A        | CASZ1    | p.Arg75Trp          | c.223C>T              | NM_001079843.2 | 0.525    | 80  | 0.485714 | 35  |
| chr10 | 100152196 | G | A        | PYROXD2  | p.Thr352Met         | c.1055C>T             | NM_032709.2    | 0.459459 | 185 | 0.185185 | 108 |
| chr12 | 21327603  | G | A        | SLCO1B1  | p.Gly107Arg         | c.319G>A              | NM_006446.4    | 0.441718 | 163 | 0.335878 | 131 |
| chr14 | 23898487  | C | A        | MYH7     | p.Arg403Leu         | c.1208G>T             | NM_000257.3    | 0.436047 | 172 | 0.411765 | 85  |
| chr14 | 35231301  | G | GTGCTC   | BAZ1A    | p.Thr1302_Pro1303fs | c.3904_3905insGAGCA   | NM_013448.2    | 0.308989 | 178 | 0.327044 | 159 |
| chr5  | 16681558  | T | C        | MYO10    | p.Lys1415Arg        | c.4244A>G             | NM_012334.2    | 0.518248 | 137 | 0.516129 | 124 |
| chr5  | 67591097  | A | G        | PIK3R1   | p.Asn201Asp         | c.601A>G              | NM_001242466.1 | 0.385185 | 135 | 0.45283  | 159 |
| chr8  | 11687883  | C | T        | FDFT1    | p.Ser278Leu         | c.833C>T              | NM_001287742.1 | 0.418033 | 122 | 0.413333 | 75  |
| chr8  | 3224671   | T | C        | CSMD1    | p.Thr1000Ala        | c.2998A>G             | NM_033225.5    | 0.384615 | 117 | 0.39726  | 73  |
| chr1  | 196963350 | C | T        | CFHR5    | p.Gln191*           | c.571C>T              | NM_030787.3    | 0.354839 | 62  | 0.674419 | 43  |
| chr1  | 23885724  | C | CTA      | ID3      | p.Ser65_Gln66fs     | c.193_194insTA        | NM_002167.4    | 0.421053 | 76  | 0.419355 | 31  |
| chr1  | 94654488  | A | G        | ARHGAP29 | p.Phe529Ser         | c.1586T>C             | NM_004815.3    | 0.459459 | 37  | 0.489796 | 49  |
| chr10 | 5415963   | C | T        | UCN3     | p.Arg94Trp          | c.280C>T              | NM_053049.2    | 0.478723 | 94  | 0.347826 | 23  |
| chr10 | 89725228  | G | T        | PTEN     | p.Ter404Leuext*?    | c.1211G>T             | NM_000314.4    | 0.448276 | 29  | 0.636364 | 33  |
| chr11 | 100814584 | T | C        | ARHGAP42 | p.Ile343Thr         | c.1028T>C             | NM_152432.2    | 0.385542 | 83  | 0.579545 | 88  |
| chr12 | 40153970  | A | G        | SLC2A13  | p.Leu602Ser         | c.1805T>C             | NM_052885.3    | 0.573034 | 89  | 0.54878  | 82  |
| chr12 | 40672017  | G | A        | LRRK2    | p.Gly732Glu         | c.2195G>A             | NM_198578.3    | 0.489583 | 96  | 0.385827 | 127 |
| chr12 | 86373447  | C | T        | MGAT4C   | p.Glu353Lys         | c.1057G>A             | NM_013244.3    | 0.551724 | 87  | 0.460674 | 89  |
| chr13 | 38160321  | G | A        | POSTN    | p.Arg284*           | c.850C>T              | NM_001135934.1 | 0.398305 | 118 | 0.288889 | 90  |
| chr15 | 75684864  | A | ACACCATT | SIN3A    | p.Val857_Gly858fs   | c.2569_2570insAATGGTG | NM_001145357.1 | 0.31677  | 161 | 0.291667 | 144 |
| chr17 | 27002001  | G | A        | SUPT6H   | p.Arg120His         | c.359G>A              | NM_003170.3    | 0.419847 | 131 | 0.454545 | 77  |
| chr17 | 74942491  | G | A        | MGAT5B   | p.Glu628Lys         | c.1882G>A             | NM_001199172.1 | 0.478992 | 119 | 0.466667 | 75  |
| chr17 | 7578393   | A | C        | TP53     | p.His179Gln         | c.537T>G              | NM_000546.5    | 0.461538 | 182 | 0.488636 | 88  |
| chr19 | 15131469  | C | T        | CCDC105  | p.Pro291Leu         | c.872C>T              | NM_173482.2    | 0.528302 | 53  | 0.428571 | 21  |
| chr2  | 170048414 | T | G        | LRP2     | p.Asn2987Thr        | c.8960A>C             | NM_004525.2    | 0.514706 | 68  | 0.325    | 80  |
| chr2  | 202131210 | A | G        | CASP8    | p.Met1?             | c.1A>G                | NM_001080124.1 | 0.85     | 40  | 0.928571 | 28  |
| chr2  | 223917774 | G | A        | KCNE4    | p.Glu127Lys         | c.379G>A              | NM_080671.3    | 0.377358 | 53  | 0.371429 | 35  |
| chr2  | 74328555  | A | G        | TET3     | p.Lys1547Arg        | c.4640A>G             | NM_001287491.1 | 0.484375 | 64  | 0.466667 | 30  |

|       |           |         |   |         |                    |                      |                |          |     |          |     |
|-------|-----------|---------|---|---------|--------------------|----------------------|----------------|----------|-----|----------|-----|
| chr20 | 55840962  | G       | A | BMP7    | p.Gln73*           | c.217C>T             | NM_001719.2    | 0.517241 | 145 | 0.488372 | 43  |
| chr20 | 55841018  | A       | G | BMP7    | p.Met54Thr         | c.161T>C             | NM_001719.2    | 0.55102  | 98  | 0.590909 | 22  |
| chr3  | 123010175 | G       | A | ADCY5   | p.Arg688Trp        | c.2062C>T            | NM_001199642.1 | 0.493506 | 77  | 0.431034 | 58  |
| chr3  | 74411062  | A       | G | CNTN3   | p.Val448Ala        | c.1343T>C            | NM_020872.1    | 0.416667 | 72  | 0.438356 | 73  |
| chr4  | 5830235   | C       | T | CRMP1   | p.Arg595His        | c.1784G>A            | NM_001014809.2 | 0.354167 | 192 | 0.147727 | 88  |
| chr4  | 94547585  | AG      | A | GRID2   | p.Arg692fs         | c.2075delG           | NM_001286838.1 | 0.544776 | 134 | 0.142857 | 98  |
| chr5  | 140432524 | C       | T | PCDHB1  | p.Ser490Phe        | c.1469C>T            | NM_013340.3    | 0.36     | 75  | 0.522727 | 88  |
| chr5  | 61688763  | CAG     | C | DIMT1   | p.Ser239fs         | c.716_717delCT       | NM_014473.2    | 0.434483 | 145 | 0.373684 | 190 |
| chr5  | 94878980  | C       | T | TTC37   | p.Val48Ile         | c.142G>A             | NM_014639.3    | 0.428571 | 56  | 0.378378 | 74  |
| chr6  | 31324143  | G       | T | HLA-B   | p.Tyr140*          | c.420C>A             | NM_005514.6.3  | 0.944444 | 36  | 1        | 25  |
| chr7  | 99359680  | T       | A | CYP3A4  | p.Lys412*          | c.1234A>T            | NM_001202855.2 | 0.43554  | 287 | 0.463878 | 263 |
| chr9  | 117552800 | C       | T | TNFSF15 | p.Val171Ile        | c.511G>A             | NM_001204344.1 | 0.459016 | 183 | 0.287958 | 191 |
| chr9  | 123852647 | C       | A | CNTRL   | p.Asn104Lys        | c.312C>A             | NM_007018.4    | 0.375    | 56  | 0.506667 | 75  |
| chr9  | 126139119 | G       | T | CRB2    | p.Lys1212Asn       | c.3636G>T            | NM_173689.6    | 0.509091 | 55  | 0.625    | 24  |
| chr9  | 126139126 | C       | G | CRB2    | p.Pro1215Ala       | c.3643C>G            | NM_173689.6    | 0.480769 | 52  | 0.714286 | 28  |
| chr9  | 137982149 | C       | T | OLFM1   | p.Arg87Trp         | c.259C>T             | NM_001282611.1 | 0.382857 | 175 | 0.333333 | 105 |
| chrX  | 70783295  | GATTCAA | G | OGT     | p.Ile795_Gln796del | c.2383_2388delATTCAA | NM_181672.2    | 0.782609 | 46  | 0.769231 | 52  |

19

20

## VFN-D3

| Chr <sup>a</sup> | Position (hg19) | REF <sup>b</sup> | ALT <sup>c</sup> | Genesymbol | AA change <sup>d</sup> | DNA change <sup>e</sup> | Transcript     | Patient AF <sup>f</sup> | Patient Depth <sup>g</sup> | PDX AF <sup>f</sup> | PDX Depth <sup>g</sup> |
|------------------|-----------------|------------------|------------------|------------|------------------------|-------------------------|----------------|-------------------------|----------------------------|---------------------|------------------------|
| chr14            | 96180289        | T                | G                | TCL1A      | p.Ile39Leu             | c.115A>C                | NM_001098725.1 | 0.446154                | 65                         | 0.538462            | 143                    |
| chr1             | 203274817       | G                | C                | BTG2       | p.Gly28Ala             | c.83G>C                 | NM_006763.2    | 0.125                   | 48                         | 0.365385            | 104                    |
| chr1             | 223568661       | G                | A                | CCDC185    | p.Arg615His            | c.1844G>A               | NM_152610.2    | 0.847826                | 46                         | 0.495146            | 103                    |
| chr1             | 41945111        | C                | T                | EDN2       | p.Arg169Gln            | c.506G>A                | NM_001956.3    | 0.25                    | 48                         | 0.423077            | 130                    |
| chr1             | 43637288        | C                | T                | EBNA1BP2   | p.Arg117Gln            | c.350G>A                | NM_001159936.1 | 0.32                    | 25                         | 0.442308            | 52                     |

|              |                 |          |          |              |                    |                     |                       |                 |           |                 |            |
|--------------|-----------------|----------|----------|--------------|--------------------|---------------------|-----------------------|-----------------|-----------|-----------------|------------|
| chr10        | 135044253       | G        | A        | UTF1         | p.Arg154Gln        | c.461G>A            | NM_003577.2           | 0.425           | 40        | 0.398058        | 103        |
| <b>chr10</b> | <b>6521018</b>  | <b>C</b> | <b>G</b> | <b>PRKCQ</b> | <b>p.Arg430Thr</b> | <b>c.1289G&gt;C</b> | <b>NM_001242413.2</b> | <b>0.555556</b> | <b>27</b> | <b>0.372549</b> | <b>51</b>  |
| chr10        | 95326613        | G        | A        | FFAR4        | p.Val46Met         | c.136G>A            | NM_001195755.1        | 0.586207        | 58        | 0.56962         | 79         |
| chr10        | 99342401        | G        | A        | ANKRD2       | p.Arg259His        | c.776G>A            | NM_001129981.2        | 0.392857        | 56        | 0.375           | 152        |
| chr11        | 102272772       | G        | A        | TMEM123      | p.Thr108Ile        | c.323C>T            | NM_052932.2           | 0.347826        | 46        | 0.435484        | 62         |
| chr11        | 61547372        | T        | A        | MYRF         | p.Ile769Asn        | c.2306T>A           | NM_001127392.1        | 0.392857        | 56        | 0.578947        | 76         |
| chr11        | 62569088        | G        | A        | NXF1         | p.Arg219*          | c.655C>T            | NM_001081491.1        | 0.276596        | 47        | 0.522936        | 109        |
| chr11        | 70331881        | G        | A        | SHANK2       | p.Thr918Met        | c.2753C>T           | NM_133266.4           | 0.458333        | 72        | 0.564103        | 117        |
| <b>chr11</b> | <b>76831837</b> | <b>G</b> | <b>A</b> | <b>CAPN5</b> | <b>p.Val457Ile</b> | <b>c.1369G&gt;A</b> | <b>NM_004055.4</b>    | <b>0.241379</b> | <b>58</b> | <b>0.357724</b> | <b>123</b> |
| chr12        | 108006584       | G        | A        | BTBD11       | p.Val150Ile        | c.448G>A            | NM_001017523.1        | 0.377049        | 61        | 0.464286        | 112        |
| chr12        | 32729320        | C        | T        | FGD4         | p.Ser10Phe         | c.29C>T             | NM_139241.2           | 0.25            | 20        | 0.510638        | 47         |
| chr12        | 65260552        | G        | A        | TBC1D30      | p.Ser387Asn        | c.1160G>A           | NM_015279.1           | 0.294118        | 17        | 0.431818        | 44         |
| chr13        | 113173350       | GGA      | G        | TUBGCP3      | p.Ser619fs         | c.1857_1858delITC   | NM_001286277.1        | 0.25            | 16        | 0.590909        | 22         |
| chr13        | 38143462        | T        | G        | POSTN        | p.Glu745Asp        | c.2235A>C           | NM_001135934.1        | 0.157895        | 19        | 0.375           | 32         |
| chr13        | 43798262        | G        | A        | ENOX1        | p.Thr576Met        | c.1727C>T           | NM_001127615.1        | 0.52381         | 21        | 0.442308        | 52         |
| chr14        | 20841852        | T        | A        | TEP1         | p.Met2197Leu       | c.6589A>T           | NM_007110.4           | 0.484848        | 33        | 0.477612        | 67         |
| chr14        | 20841854        | G        | C        | TEP1         | p.Ala2196Gly       | c.6587C>G           | NM_007110.4           | 0.516129        | 31        | 0.469697        | 66         |
| chr14        | 35482640        | T        | G        | SRP54        | p.Val193Gly        | c.578T>G            | NM_001146282.1        | 0.568966        | 58        | 0.544444        | 90         |
| chr14        | 55511044        | A        | AG       | SOCS4        | p.Arg429_Val430fs  | c.1286_1287insG     | NM_080867.2           | 0.333333        | 18        | 0.538462        | 39         |
| chr14        | 86089014        | C        | T        | FLRT2        | p.Leu386Phe        | c.1156C>T           | NM_013231.4           | 0.416667        | 36        | 0.361702        | 47         |
| chr15        | 24921172        | G        | T        | NPAP1        | p.Arg53Leu         | c.158G>T            | NM_018958.2           | 0.536585        | 41        | 0.422222        | 90         |
| chr15        | 24921658        | A        | C        | NPAP1        | p.Lys215Thr        | c.644A>C            | NM_018958.2           | 0.372093        | 86        | 0.489796        | 196        |
| chr15        | 34137113        | G        | A        | RYR3         | p.Trp4449*         | c.13347G>A          | NM_001036.3           | 0.314815        | 54        | 0.418367        | 98         |
| chr15        | 42278110        | G        | A        | PLA2G4E      | p.Pro710Leu        | c.2129C>T           | NM_001206670.1        | 0.454545        | 44        | 0.467532        | 77         |
| chr15        | 75015147        | G        | A        | CYP1A1       | p.Arg98Trp         | c.292C>T            | NM_000499.3           | 0.320755        | 53        | 0.396552        | 116        |
| chr16        | 55735796        | C        | A        | SLC6A2       | p.Pro594Thr        | c.1780C>A           | NM_001043.3           | 0.263158        | 19        | 0.367647        | 68         |
| chr16        | 71007800        | T        | C        | HYDIN        | p.Ile1721Val       | c.5161A>G           | NM_001270974.1        | 0.184211        | 76        | 0.207547        | 159        |
| chr17        | 10402365        | G        | A        | MYH1         | p.Gln1304*         | c.3910C>T           | NM_005963.3           | 0.238095        | 21        | 0.588235        | 51         |

|             |                  |          |          |              |                   |                    |                       |                 |           |                 |           |
|-------------|------------------|----------|----------|--------------|-------------------|--------------------|-----------------------|-----------------|-----------|-----------------|-----------|
| chr17       | 11865224         | A        | G        | DNAH9        | p.Asn4295Ser      | c.12884A>G         | NM_001372.3           | 0.384615        | 78        | 0.401235        | 162       |
| chr17       | 4578596          | A        | G        | PELP1        | p.Leu230Ser       | c.689T>C           | NM_001278241.1        | 0.416667        | 24        | 0.542373        | 59        |
| chr17       | 72477892         | G        | A        | CD300A       | p.Ala119Thr       | c.355G>A           | NM_001256841.1        | 0.393939        | 33        | 0.333333        | 60        |
| chr17       | 8702423          | G        | A        | MFSD6L       | p.Arg6Trp         | c.16C>T            | NM_152599.3           | 0.354839        | 31        | 0.396226        | 106       |
| chr18       | 44030275         | G        | A        | RNF165       | p.Arg19Gln        | c.56G>A            | NM_001256758.1        | 0.232558        | 43        | 0.378947        | 95        |
| chr18       | 59157866         | A        | G        | CDH20        | p.Asp27Gly        | c.80A>G            | NM_031891.2           | 0.27551         | 98        | 0.386243        | 189       |
| chr18       | 72344362         | C        | T        | ZNF407       | p.His463Tyr       | c.1387C>T          | NM_001146189.1        | 0.297872        | 47        | 0.328571        | 70        |
| chr19       | 13248324         | T        | G        | NACC1        | p.Ile420Ser       | c.1259T>G          | NM_052876.3           | 0.176471        | 17        | 0.414634        | 41        |
| chr19       | 16942313         | C        | T        | SIN3B        | p.Thr79Ile        | c.236C>T           | NM_001297595.1        | 0.3125          | 16        | 0.551724        | 29        |
| chr19       | 18960969         | T        | A        | UPF1         | p.Cys183Ser       | c.547T>A           | NM_001297549.1        | 0.4375          | 32        | 0.537313        | 67        |
| chr19       | 2129444          | G        | C        | AP3D1        | p.Ala202Gly       | c.605C>G           | NM_001261826.1        | 0.365079        | 63        | 0.3125          | 112       |
| chr19       | 21606258         | A        | T        | ZNF493       | p.Lys266Ile       | c.797A>T           | NM_001076678.2        | 0.555556        | 18        | 0.5             | 24        |
| chr19       | 36352753         | G        | A        | KIRREL2      | p.Arg446Gln       | c.1337G>A          | NM_032123.6           | 0.666667        | 18        | 0.54386         | 57        |
| chr19       | 47282088         | C        | T        | SLC1A5       | p.Arg73His        | c.218G>A           | NM_001145144.1        | 0.421053        | 38        | 0.367647        | 68        |
| chr19       | 5653425          | G        | A        | SAFB         | p.Ser507Asn       | c.1520G>A          | NM_001201338.1        | 0.409091        | 22        | 0.314815        | 54        |
| <b>chr2</b> | <b>198285841</b> | <b>G</b> | <b>A</b> | <b>SF3B1</b> | <b>p.Ser71Leu</b> | <b>c.212C&gt;T</b> | <b>NM_001005526.1</b> | <b>0.392857</b> | <b>28</b> | <b>0.367347</b> | <b>49</b> |
| chr2        | 209036721        | G        | A        | C2orf80      | p.Arg149Cys       | c.445C>T           | NM_001099334.2        | 0.458333        | 24        | 0.387097        | 62        |
| chr2        | 27249157         | G        | A        | MAPRE3       | p.Ala263Thr       | c.787G>A           | NM_012326.2           | 0.162791        | 43        | 0.282828        | 99        |
| chr2        | 84955003         | C        | T        | DNAH6        | p.Arg3395*        | c.10183C>T         | NM_001370.1           | 0.466667        | 30        | 0.22807         | 57        |
| chr2        | 98737829         | G        | T        | VWA3B        | p.Ala204Ser       | c.610G>T           | NM_144992.4           | 0.380952        | 42        | 0.463768        | 69        |
| chr20       | 44236765         | G        | A        | WFDC9        | p.Ser85Leu        | c.254C>T           | NM_147198.3           | 0.473684        | 57        | 0.5             | 66        |
| chr20       | 62737878         | C        | T        | NPBWR2       | p.Ala103Thr       | c.307G>A           | NM_005286.2           | 0.368421        | 76        | 0.474747        | 198       |
| chr21       | 31768574         | A        | G        | KRTAP13-1    | p.Gln57Arg        | c.170A>G           | NM_181599.2           | 0.404255        | 47        | 0.527778        | 108       |
| chr22       | 20103993         | T        | C        | TRMT2A       | p.Gln56Arg        | c.167A>G           | NM_001257994.1        | 0.38            | 50        | 0.515789        | 95        |
| chr22       | 23230404         | A        | C        | IGLL5        | p.Glu22Ala        | c.65A>C            | NM_001256296.1        | 0.9             | 10        | 0.933333        | 45        |
| chr3        | 15126539         | T        | C        | ZFYVE20      | p.Asp135Gly       | c.404A>G           | NM_022340.2           | 0.65625         | 32        | 0.411765        | 34        |
| chr3        | 164908039        | T        | G        | SLITRK3      | p.Lys194Gln       | c.580A>C           | NM_014926.2           | 0.179487        | 39        | 0.292308        | 65        |
| chr3        | 173997143        | C        | T        | NLGN1        | p.Thr451Ile       | c.1352C>T          | NM_014932.3           | 0.304348        | 69        | 0.255556        | 90        |



|               |           |      |   |          |                  |                 |                |          |    |          |     |
|---------------|-----------|------|---|----------|------------------|-----------------|----------------|----------|----|----------|-----|
| chr3          | 35729256  | GT   | G | ARPP21   | p.Ser96fs        | c.288delT       | NM_001267617.1 | 0.538462 | 13 | 0.388889 | 18  |
| chr3          | 37163140  | G    | T | LRRFIP2  | p.His74Asn       | c.220C>A        | NM_001282691.1 | 0.133333 | 30 | 0.477273 | 44  |
| chr3          | 38182641  | T    | C | MYD88    | p.Ter160Argext*? | c.478T>C        | NM_001172566.1 | 0.37037  | 27 | 0.55     | 60  |
| chr4          | 126370555 | C    | T | FAT4     | p.Thr279Ile      | c.8390C>T       | NM_001291285.1 | 0.25     | 24 | 0.425    | 40  |
| chr4          | 20717844  | C    | A | PACRGL   | p.Gln189Lys      | c.565C>A        | NM_001258346.1 | 0.631579 | 19 | 0.4      | 30  |
| chr4          | 44176914  | C    | A | KCTD8    | p.Glu439*        | c.1315G>T       | NM_198353.2    | 0.468085 | 47 | 0.584906 | 53  |
| chr4          | 85742333  | C    | T | WDFY3    | p.Val499Met      | c.1495G>A       | NM_014991.4    | 0.285714 | 28 | 0.428571 | 56  |
| chr5          | 176016578 | C    | T | CDHR2    | p.Pro1056Leu     | c.3167C>T       | NM_001171976.1 | 0.367647 | 68 | 0.411392 | 158 |
| chr5          | 57913591  | G    | A | RAB3C    | p.Arg49His       | c.146G>A        | NM_138453.2    | 0.416667 | 24 | 0.5      | 34  |
| chr6          | 110056434 | G    | T | FIG4     | p.Met193Ile      | c.579G>T        | NM_014845.5    | 0.785714 | 14 | 1        | 18  |
| chr6_cox_hap2 | 2836811   | A    | T | HLA-B    | p.Tyr147Asn      | c.439T>A        | NM_005514.6.4  | 0.763158 | 38 | 0.963303 | 109 |
| chr6_cox_hap2 | 2836836   | G    | C | HLA-B    | p.Asn138Lys      | c.414C>G        | NM_005514.6.4  | 0.790698 | 43 | 0.978417 | 139 |
| chr6_cox_hap2 | 2836882   | T    | C | HLA-B    | p.Tyr123Cys      | c.368A>G        | NM_005514.6.4  | 0.911111 | 45 | 0.956897 | 116 |
| chr6_cox_hap2 | 2836897   | G    | T | HLA-B    | p.Thr118Asn      | c.353C>A        | NM_005514.6.4  | 0.741935 | 31 | 0.884058 | 69  |
| chr7          | 142881493 | C    | T | TAS2R39  | p.Arg328*        | c.982C>T        | NM_176881.2    | 0.428571 | 56 | 0.45045  | 111 |
| chr7          | 146829418 | C    | T | CNTNAP2  | p.Arg389Trp      | c.1165C>T       | NM_014141.5    | 0.416667 | 36 | 0.407895 | 76  |
| chr7          | 15725797  | ATGG | A | MEOX2    | p.His76_His77del | c.228_230delCCA | NM_005924.4    | 0.466667 | 15 | 0.190476 | 42  |
| chr7          | 6193773   | C    | G | USP42    | p.Ser863Trp      | c.2588C>G       | NM_032172.2    | 0.54386  | 57 | 0.467742 | 124 |
| chr7          | 95750622  | C    | A | SLC25A13 | p.Val638Phe      | c.1912G>T       | NM_001160210.1 | 0.268293 | 41 | 0.405063 | 79  |
| chr8          | 144993545 | G    | A | PLEC     | p.Arg3509Cys     | c.10525C>T      | NM_000445.4    | 0.454545 | 44 | 0.47619  | 126 |
| chr8          | 25708195  | T    | G | EBF2     | p.Lys537Asn      | c.1611A>C       | NM_022659.3    | 0.269231 | 52 | 0.382022 | 89  |
| chr8          | 97318780  | G    | A | PTDSS1   | p.Val189Met      | c.565G>A        | NM_001290225.1 | 0.454545 | 44 | 0.451613 | 62  |
| chr9          | 13107023  | C    | T | MPDZ     | p.Glu2019Lys     | c.6055G>A       | NM_001261406.1 | 0.473684 | 38 | 0.480769 | 52  |
| chrX          | 133551199 | A    | G | PHF6     | p.Lys279Glu      | c.835A>G        | NM_001015877.1 | 0.4375   | 16 | 0.384615 | 26  |
| chrX          | 135432145 | G    | A | GPR112   | p.Val2094Ile     | c.6280G>A       | NM_153834.3    | 0.285714 | 21 | 0.253968 | 63  |
| chrX          | 35820689  | C    | T | MAGEB16  | p.His126Tyr      | c.376C>T        | NM_001099921.1 | 0.306122 | 49 | 0.537736 | 106 |
| chrX          | 41007811  | G    | C | USP9X    | p.Asp537His      | c.1609G>C       | NM_001039590.2 | 0.351852 | 54 | 0.444444 | 99  |
| chrX          | 67942430  | G    | A | STARD8   | p.Arg914His      | c.2741G>A       | NM_001142503.2 | 0.340659 | 91 | 0.4      | 135 |

|      |          |   |    |        |                   |               |             |     |    |      |    |
|------|----------|---|----|--------|-------------------|---------------|-------------|-----|----|------|----|
| chrX | 90691016 | A | AT | PABPC5 | p.Tyr147_Ala148fs | c.441_442insT | NM_080832.2 | 0.5 | 44 | 0.48 | 75 |
|------|----------|---|----|--------|-------------------|---------------|-------------|-----|----|------|----|

21

22 <sup>a</sup>Chromosome; <sup>b</sup>Reference allele; <sup>c</sup>Alternative allele; <sup>d</sup>Amino-acid change; <sup>e</sup>DNA sequence change; <sup>f</sup>Allele frequency in patient's sample/PDX; <sup>g</sup>Read depth in

23 patient's sample/PDX.

24

25 **Supplementary Table 5.** A complete list of protein coding variants which passed the filtering described in supplementary methods and were found only in  
 26 the derived PDX models and not the parental tumor samples. Variants in genes of special interest based on a list of frequently mutated genes are  
 27 highlighted in red.

28  
 29

**VFN-D1**

| Chr <sup>a</sup> | Position (hg19) | REF <sup>b</sup> | ALT <sup>c</sup> | Genesymbol | AA change <sup>d</sup> | DNA change <sup>e</sup> | Transcript     | Patient AF <sup>f</sup> | Patient Depth <sup>g</sup> | PDX AF <sup>f</sup> | PDX Depth <sup>g</sup> |
|------------------|-----------------|------------------|------------------|------------|------------------------|-------------------------|----------------|-------------------------|----------------------------|---------------------|------------------------|
| chr15            | 23889151        | G                | T                | MAGEL2     | p.Pro1247Thr           | c.3739C>A               | NM_019066.4    | 0                       | 0                          | 0.2                 | 30                     |
| chr11            | 125893317       | G                | T                | CDON       | p.Leu19Met             | c.55C>A                 | NM_001243597.1 | 0.0263158               | 76                         | 0.20635             | 63                     |
| chr13            | 110831303       | G                | T                | COL4A1     | p.Pro809Thr            | c.2425C>A               | NM_001845.4    | 0                       | 0                          | 0.23529             | 17                     |
| chr16            | 58545362        | G                | T                | NDRG4      | p.Arg353Leu            | c.1058G>T               | NM_001130487.1 | 0                       | 0                          | 0.2                 | 25                     |
| chr20            | 4202658         | G                | T                | ADRA1D     | p.Arg411Ser            | c.1231C>A               | NM_000678.3    | 0                       | 0                          | 0.2                 | 15                     |
| chr6             | 26020763        | G                | T                | HIST1H3A   | p.Ala16Ser             | c.46G>T                 | NM_003529.2    | 0                       | 0                          | 0.25                | 40                     |
| chr1             | 41094490        | C                | A                | RIMS3      | p.Val236Leu            | c.706G>T                | NM_014747.2    | 0.0491803               | 122                        | 0.29268             | 123                    |
| chr16            | 47488041        | C                | A                | ITFG1      | p.Val104Phe            | c.310G>T                | NM_030790.3    | 0.0487805               | 82                         | 0.32099             | 81                     |
| chr17            | 57915712        | C                | T                | VMP1       | p.Ala344Val            | c.1031C>T               | NM_030938.3    | 0.015873                | 63                         | 0.20588             | 68                     |
| chr19            | 12902605        | AG               | A                | JUNB       | p.Gln7fs               | c.21delG                | NM_002229.2    | 0.0454545               | 44                         | 0.23684             | 38                     |
| chr2             | 163057091       | C                | T                | FAP        | p.Arg396Lys            | c.1187G>A               | NM_001291807.1 | 0.0178571               | 56                         | 0.375               | 56                     |
| chr3             | 49711998        | G                | T                | APEH       | p.Cys30Phe             | c.89G>T                 | NM_001640.3    | 0.0416667               | 24                         | 0.21053             | 19                     |
| chr3             | 52518558        | G                | T                | NISCH      | p.Ala520Ser            | c.1558G>T               | NM_007184.3    | 0.0416667               | 24                         | 0.2                 | 20                     |
| chr6             | 37140782        | G                | A                | PIM1       | p.Val297Val            | c.891G>A                | NM_001243186.1 | 0.0210526               | 95                         | 0.2                 | 100                    |
| chr6             | 44143859        | C                | G                | CAPN11     | p.His296Asp            | c.886C>G                | NM_007058.3    | 0.0104167               | 96                         | 0.26582             | 79                     |
| chrX             | 41203018        | G                | T                | DDX3X      | p.Leu236Phe            | c.708G>T                | NM_001193416.1 | 0.047619                | 42                         | 0.23529             | 34                     |
| chr1             | 156697310       | G                | T                | ISG20L2    | p.Asn45Lys             | c.135C>A                | NM_030980.1    | 0                       | 0                          | 0.21429             | 28                     |
| chr1             | 167691425       | G                | T                | MPZL1      | p.Ala13Ser             | c.37G>T                 | NM_001146191.1 | 0                       | 0                          | 0.33333             | 18                     |
| chr1             | 167691455       | G                | T                | MPZL1      | p.Val23Leu             | c.67G>T                 | NM_001146191.1 | 0                       | 0                          | 0.2                 | 20                     |
| chr1             | 171553578       | G                | T                | PRRC2C     | p.Gln2552His           | c.7656G>T               | NM_015172.3    | 0                       | 0                          | 0.21429             | 14                     |

|              |                  |          |          |              |                    |                    |                       |          |          |            |           |
|--------------|------------------|----------|----------|--------------|--------------------|--------------------|-----------------------|----------|----------|------------|-----------|
| chr1         | 200842802        | C        | A        | GPR25        | p.Leu213Met        | c.637C>A           | NM_005298.3           | 0        | 0        | 0.23529    | 17        |
| chr10        | 17271471         | G        | T        | VIM          | p.Gly17Val         | c.50G>T            | NM_003380.3           | 0        | 0        | 0.2        | 20        |
| <b>chr11</b> | <b>116661258</b> | <b>C</b> | <b>A</b> | <b>APOA5</b> | <b>p.Gln229His</b> | <b>c.687G&gt;T</b> | <b>NM_001166598.1</b> | <b>0</b> | <b>0</b> | <b>0.3</b> | <b>10</b> |
| chr11        | 13031458         | G        | T        | RASSF10      | p.Arg112Leu        | c.335G>T           | NM_001080521.2        | 0        | 0        | 0.30769    | 13        |
| chr12        | 107713780        | G        | T        | BTBD11       | p.Val355Phe        | c.1063G>T          | NM_001018072.1        | 0        | 0        | 0.25       | 16        |
| chr12        | 133084936        | G        | T        | FBRSL1       | p.Gln163His        | c.489G>T           | NM_001142641.1        | 0        | 0        | 0.2        | 15        |
| chr14        | 103592962        | G        | T        | TNFAIP2      | p.Gln56His         | c.168G>T           | NM_006291.2           | 0        | 0        | 0.22222    | 18        |
| chr15        | 41611938         | C        | A        | OIP5         | p.Val144Phe        | c.430G>T           | NM_007280.1           | 0        | 0        | 0.2        | 20        |
| chr15        | 41793745         | G        | T        | ITPKA        | p.Ala192Ser        | c.574G>T           | NM_002220.2           | 0        | 0        | 0.25       | 12        |
| chr15        | 43501575         | G        | T        | EPB42        | p.Asn273Lys        | c.819C>A           | NM_000119.2           | 0        | 0        | 0.26667    | 15        |
| chr15        | 54306082         | G        | T        | UNC13C       | p.Glu328*          | c.982G>T           | NM_001080534.1        | 0        | 0        | 0.21429    | 14        |
| chr16        | 30751032         | G        | T        | SRCAP        | p.Arg3224Ile       | c.9671G>T          | NM_006662.2           | 0        | 0        | 0.22222    | 18        |
| chr17        | 46620582         | G        | T        | HOXB2        | p.Leu307Ile        | c.919C>A           | NM_002145.3           | 0        | 0        | 0.2        | 20        |
| chr17        | 74236295         | G        | T        | RNF157       | p.His9Gln          | c.27C>A            | NM_052916.2           | 0        | 0        | 0.23077    | 13        |
| chr17        | 7751798          | C        | A        | KDM6B        | p.Ser731Tyr        | c.2192C>A          | NM_001080424.1        | 0        | 0        | 0.35714    | 14        |
| chr19        | 49000772         | G        | T        | LMTK3        | p.Ala1214Asp       | c.3641C>A          | NM_001080434.1        | 0        | 0        | 0.26316    | 19        |
| chr19        | 55944541         | C        | A        | SHISA7       | p.Lys533Asn        | c.1599G>T          | NM_001145176.1        | 0        | 0        | 0.2        | 15        |
| chr2         | 239147819        | G        | T        | HES6         | p.His106Gln        | c.318C>A           | NM_001142853.2        | 0        | 0        | 0.23529    | 17        |
| chr2         | 47596684         | G        | T        | EPCAM        | p.Ala14Ser         | c.40G>T            | NM_002354.2           | 0        | 0        | 0.22222    | 18        |
| chr3         | 128720805        | G        | T        | EFCC1        | p.Asp112Tyr        | c.334G>T           | NM_024768.2           | 0        | 0        | 0.28571    | 14        |
| chr3         | 49724399         | G        | T        | MST1         | p.His237Asn        | c.709C>A           | NM_020998.3           | 0        | 0        | 0.38462    | 13        |
| chr3         | 49724403         | G        | T        | MST1         | p.His235Gln        | c.705C>A           | NM_020998.3           | 0        | 0        | 0.30769    | 13        |
| chr5         | 132159114        | G        | T        | SHROOM1      | p.Ala685Asp        | c.2054C>A          | NM_001172700.1        | 0        | 0        | 0.21053    | 19        |
| chr5         | 148753957        | G        | T        | IL17B        | p.Ala173Asp        | c.518C>A           | NM_014443.2           | 0        | 0        | 0.25       | 20        |
| chr5         | 176759209        | G        | T        | LMAN2        | p.Pro317Thr        | c.949C>A           | NM_006816.2           | 0        | 0        | 0.23077    | 13        |
| chr5         | 176830879        | C        | T        | F12          | p.Ala411Thr        | c.1231G>A          | NM_000505.3           | 0        | 0        | 0.21429    | 14        |
| chr6         | 106960878        | G        | T        | AIM1         | p.Gly221Val        | c.662G>T           | NM_001624.2           | 0        | 0        | 0.27273    | 11        |
| chr6         | 36098407         | G        | T        | MAPK13       | p.Lys16Asn         | c.48G>T            | NM_002754.4           | 0        | 0        | 0.2        | 15        |

|      |           |   |   |        |             |          |                |   |   |         |    |
|------|-----------|---|---|--------|-------------|----------|----------------|---|---|---------|----|
| chr6 | 37138563  | C | T | PIM1   | p.Pro124Ser | c.370C>T | NM_001243186.1 | 0 | 0 | 0.23529 | 34 |
| chr7 | 150761849 | G | T | SLC4A2 | p.Val152Leu | c.454G>T | NM_001199692.1 | 0 | 0 | 0.25714 | 35 |
| chr8 | 55370994  | G | T | SOX17  | p.Ser99Ile  | c.296G>T | NM_022454.3    | 0 | 0 | 0.21429 | 14 |
| chrX | 153994672 | G | T | DKC1   | p.Ala149Ser | c.445G>T | NM_001142463.2 | 0 | 0 | 0.25    | 32 |
| chrX | 34149603  | G | T | FAM47A | p.Leu265Met | c.793C>A | NM_203408.3    | 0 | 0 | 0.2     | 25 |
| chrX | 46434324  | G | T | CHST7  | p.Val320Leu | c.958G>T | NM_019886.3    | 0 | 0 | 0.29412 | 17 |
| chrX | 53457415  | G | T | RIBC1  | p.Gln245His | c.735G>T | NM_001031745.4 | 0 | 0 | 0.2     | 20 |

30

31

## VFN-D2

| Chr <sup>a</sup> | Position (hg19) | REF <sup>b</sup> | ALT <sup>c</sup> | Genesymbol | AA change <sup>d</sup> | DNA change <sup>e</sup> | Transcript     | Patient AF <sup>f</sup> | Patient Depth <sup>g</sup> | PDX AF <sup>f</sup> | PDX Depth <sup>g</sup> |
|------------------|-----------------|------------------|------------------|------------|------------------------|-------------------------|----------------|-------------------------|----------------------------|---------------------|------------------------|
| chr1             | 116931321       | G                | A                | ATP1A1     | p.Gly188Glu            | c.563G>A                | NM_000701.7    | 0                       | 116                        | 0.32                | 100                    |
| chr1             | 176838140       | G                | C                | ASTN1      | p.Leu1163Val           | c.3487C>G               | NM_207108.2    | 0                       | 118                        | 0.34589             | 292                    |
| chr1             | 179399737       | T                | G                | AXDND1     | p.Phe495Val            | c.1483T>G               | NM_144696.5    | 0                       | 41                         | 0.22973             | 74                     |
| chr1             | 223179209       | G                | T                | DISP1      | p.Lys1490Asn           | c.4470G>T               | NM_032890.3    | 0                       | 28                         | 0.2                 | 20                     |
| chr1             | 63300476        | T                | A                | ATG4C      | p.Tyr348Asn            | c.1042T>A               | NM_032852.3    | 0.0114286               | 175                        | 0.23423             | 222                    |
| chr11            | 66297402        | G                | T                | BBS1       | p.Glu484Asp            | c.1452G>T               | NM_024649.4    | 0                       | 81                         | 0.2                 | 30                     |
| chr15            | 40954323        | C                | A                | CASC5      | p.Tyr2296*             | c.6888C>A               | NM_144508.4    | 0                       | 195                        | 0.25444             | 169                    |
| chr17            | 33316507        | A                | C                | LIG3       | p.Glu238Asp            | c.714A>C                | NM_002311.4    | 0                       | 70                         | 0.2                 | 35                     |
| chr17            | 41561472        | G                | A                | DHX8       | p.Ala23Thr             | c.67G>A                 | NM_004941.1    | 0                       | 242                        | 0.22222             | 99                     |
| chr17            | 63010434        | A                | T                | GNA13      | p.Phe264Ile            | c.790T>A                | NM_001282425.1 | 0                       | 130                        | 0.22137             | 131                    |
| chr18            | 28737398        | A                | G                | DSC1       | p.Leu96Pro             | c.287T>C                | NM_004948.3    | 0                       | 96                         | 0.22581             | 93                     |
| chr19            | 15375367        | G                | A                | BRD4       | p.Leu354Phe            | c.1060C>T               | NM_014299.2    | 0                       | 275                        | 0.28022             | 182                    |
| chr20            | 36962889        | G                | T                | BPI        | p.Val448Phe            | c.1342G>T               | NM_001725.2    | 0.0033898               | 295                        | 0.28061             | 196                    |
| chr22            | 20077574        | A                | G                | DGCR8      | p.Ser367Gly            | c.1099A>G               | NM_001190326.1 | 0                       | 135                        | 0.26136             | 88                     |
| chr4             | 84509364        | C                | A                | AGPAT9     | p.Leu186Ile            | c.556C>A                | NM_001256421.1 | 0.006993                | 143                        | 0.34524             | 84                     |

|             |                 |          |          |              |                         |                     |                       |                  |            |                |            |
|-------------|-----------------|----------|----------|--------------|-------------------------|---------------------|-----------------------|------------------|------------|----------------|------------|
| chr4        | 96035902        | G        | T        | BMPR1B       | p.Glu59*                | c.175G>T            | NM_001203.2           | 0.01             | 300        | 0.22105        | 190        |
| chr7        | 44149689        | G        | A        | AEBP1        | p.Gly409Asp             | c.1226G>A           | NM_001129.4           | 0                | 191        | 0.25676        | 74         |
| chr8        | 125384159       | G        | T        | TMEM65       | p.His80Gln              | c.240C>A            | NM_194291.2           | 0                | 38         | 0.21429        | 14         |
| <b>chrX</b> | <b>41205854</b> | <b>A</b> | <b>G</b> | <b>DDX3X</b> | <b>p.Thr532Ala</b>      | <b>c.1594A&gt;G</b> | <b>NM_001193416.1</b> | <b>0.0089286</b> | <b>112</b> | <b>0.25325</b> | <b>154</b> |
| chr1        | 150482355       | C        | A        | ECM1         | p.Leu88Ile              | c.262C>A            | NM_001202858.1        | 0.0212766        | 47         | 0.55405        | 148        |
| chr1        | 248790005       | G        | T        | OR2T11       | p.Ala142Asp             | c.425C>A            | NM_001001964.1        | 0.016129         | 62         | 0.27273        | 11         |
| chr10       | 126480314       | G        | T        | METTL10      | p.Ser30*                | c.89C>A             | NM_212554.2           | 0.0465116        | 43         | 0.21053        | 19         |
| chr10       | 21805577        | G        | T        | SKIDA1       | p.Ala392Glu             | c.1175C>A           | NM_207371.3           | 0.0140845        | 71         | 0.22222        | 18         |
| chr11       | 60233452        | T        | A        | MS4A1        | p.Ile132Asn             | c.395T>A            | NM_021950.3           | 0.015873         | 63         | 0.25373        | 67         |
| chr11       | 60233473        | T        | G        | MS4A1        | p.Leu139Arg             | c.416T>G            | NM_021950.3           | 0.0169492        | 59         | 0.31035        | 58         |
| chr11       | 62455481        | G        | T        | LRRN4CL      | p.Ala167Asp             | c.500C>A            | NM_203422.3           | 0.030303         | 33         | 0.33333        | 15         |
| chr12       | 1969341         | A        | G        | CACNA2D4     | p.Phe637Ser             | c.1910T>C           | NM_172364.4           | 0.0092593        | 108        | 0.40845        | 71         |
| chr13       | 99536071        | G        | C        | DOCK9        | p.Thr822Ser             | c.2465C>G           | NM_001130048.1        | 0.0089286        | 112        | 0.24272        | 103        |
| chr16       | 3016759         | G        | T        | KREMEN2      | splice_acceptor_variant | c.487G>T            | NM_001253725.1        | 0.0178571        | 56         | 0.22222        | 27         |
| chr16       | 50667345        | G        | T        | NKD1         | p.Val356Leu             | c.1066G>T           | NM_033119.4           | 0.015625         | 64         | 0.31579        | 19         |
| chr2        | 226447631       | G        | T        | NYAP2        | p.Gly500Cys             | c.1498G>T           | NM_020864.1           | 0.0294118        | 34         | 0.23529        | 17         |
| chr20       | 43530195        | G        | T        | YWHAB        | p.Glu7Asp               | c.21G>T             | NM_003404.4           | 0.0212766        | 47         | 0.25           | 24         |
| chr20       | 61050106        | G        | T        | GATA5        | p.Pro158Thr             | c.472C>A            | NM_080473.4           | 0.0227273        | 44         | 0.2            | 15         |
| chr22       | 50988318        | G        | T        | KLHDC7B      | p.Gly575Trp             | c.1723G>T           | NM_138433.3           | 0.0322581        | 31         | 0.22222        | 18         |
| chr3        | 133119341       | G        | T        | BFSP2        | p.Met138Ile             | c.414G>T            | NM_003571.3           | 0.0212766        | 47         | 0.2            | 20         |
| chr5        | 110074872       | G        | T        | SLC25A46     | p.Ala18Ser              | c.52G>T             | NM_138773.1           | 0.025641         | 39         | 0.21053        | 19         |
| chr6        | 126070938       | G        | T        | HEY2         | p.Glu6*                 | c.16G>T             | NM_012259.2           | 0.0166667        | 60         | 0.22222        | 18         |
| chrX        | 57313446        | G        | T        | FAAH2        | p.Arg63Ile              | c.188G>T            | NM_174912.3           | 0.0222222        | 45         | 0.23529        | 17         |
| chr1        | 52824735        | G        | T        | CC2D1B       | p.Asp407Glu             | c.1221C>A           | NM_032449.2           | 0                | 14         | 0.46154        | 13         |
| chr10       | 114903688       | C        | T        | TCF7L2       | p.Pro208Leu             | c.623C>T            | NM_001146284.1        | 0                | 71         | 0.22222        | 36         |
| chr16       | 30581744        | G        | T        | ZNF688       | p.Asn94Lys              | c.282C>A            | NM_001024683.1        | 0                | 33         | 0.2            | 15         |
| chr19       | 18121516        | G        | T        | ARRDC2       | p.Arg378Leu             | c.1133G>T           | NM_001025604.2        | 0                | 40         | 0.21739        | 23         |
| chr4        | 143130063       | A        | C        | INPP4B       | p.Leu318Arg             | c.953T>G            | NM_001101669.1        | 0                | 107        | 0.23596        | 89         |

|              |                  |          |          |                |                    |                     |                       |          |           |                |           |
|--------------|------------------|----------|----------|----------------|--------------------|---------------------|-----------------------|----------|-----------|----------------|-----------|
| chr5         | 163483           | G        | T        | PLEKHG4B       | p.Cys743Phe        | c.2228G>T           | NM_052909.3           | 0        | 32        | 0.2            | 20        |
| chr9         | 35712111         | G        | T        | TLN1           | p.Ala1191Glu       | c.3572C>A           | NM_006289.3           | 0        | 40        | 0.26316        | 38        |
| chrX         | 3030539          | G        | T        | ARSF           | p.Cys572Phe        | c.1715G>T           | NM_001201538.1        | 0        | 45        | 0.21429        | 28        |
| <b>chr1</b>  | <b>109792835</b> | <b>G</b> | <b>T</b> | <b>CELSR2</b>  | <b>p.Arg45Leu</b>  | <b>c.134G&gt;T</b>  | <b>NM_001408.2</b>    | <b>0</b> | <b>44</b> | <b>0.21053</b> | <b>19</b> |
| chr1         | 176863891        | C        | A        | ASTN1          | p.Ser916Ile        | c.2747G>T           | NM_001286164.1        | 0        | 119       | 0.31293        | 147       |
| chr1         | 176863966        | C        | G        | ASTN1          | p.Gly891Ala        | c.2672G>C           | NM_001286164.1        | 0        | 48        | 0.26563        | 64        |
| chr1         | 182829306        | T        | C        | DHX9           | p.Ile440Thr        | c.1319T>C           | NM_001357.4           | 0        | 46        | 0.43836        | 73        |
| <b>chr1</b>  | <b>44056951</b>  | <b>G</b> | <b>A</b> | <b>PTPRF</b>   | <b>p.Val420Met</b> | <b>c.1258G&gt;A</b> | <b>NM_002840.3</b>    | <b>0</b> | <b>42</b> | <b>0.2</b>     | <b>20</b> |
| chr1         | 45671790         | G        | T        | ZSWIM5         | p.Ala78Glu         | c.233C>A            | NM_020883.1           | 0        | 49        | 0.23077        | 13        |
| chr1         | 77334265         | G        | T        | ST6GALNAC5     | p.Lys33Asn         | c.99G>T             | NM_030965.1           | 0        | 38        | 0.27273        | 22        |
| chr1         | 78959193         | G        | T        | PTGFR          | p.Met255Ile        | c.765G>T            | NM_000959.3           | 0        | 18        | 0.24           | 25        |
| <b>chr10</b> | <b>116075491</b> | <b>G</b> | <b>T</b> | <b>AFAP1L2</b> | <b>p.Ser147Tyr</b> | <b>c.440C&gt;A</b>  | <b>NM_001001936.2</b> | <b>0</b> | <b>37</b> | <b>0.23529</b> | <b>17</b> |
| chr10        | 133946947        | G        | T        | JAKMIP3        | p.Glu255Asp        | c.765G>T            | NM_001105521.2        | 0        | 52        | 0.21739        | 23        |
| chr10        | 71266587         | C        | A        | TSPAN15        | p.Phe246Leu        | c.738C>A            | NM_012339.3           | 0        | 47        | 0.23529        | 17        |
| chr11        | 13031251         | G        | T        | RASSF10        | p.Arg43Leu         | c.128G>T            | NM_001080521.2        | 0        | 21        | 0.22222        | 18        |
| chr11        | 2424444          | C        | A        | TSSC4          | p.Pro194His        | c.581C>A            | NM_001297658.1        | 0        | 61        | 0.24           | 25        |
| chr11        | 64600431         | G        | T        | CDC42BPG       | p.Ala911Asp        | c.2732C>A           | NM_017525.2           | 0        | 66        | 0.26316        | 19        |
| chr11        | 65413941         | G        | T        | SIPA1          | p.Arg479Leu        | c.1436G>T           | NM_006747.3           | 0        | 43        | 0.25           | 12        |
| chr11        | 72437693         | G        | T        | ARAP1          | p.Arg161Ser        | c.481C>A            | NM_001040118.2        | 0        | 50        | 0.33333        | 18        |
| chr12        | 111748080        | G        | T        | CUX2           | p.Lys498Asn        | c.1494G>T           | NM_015267.3           | 0        | 46        | 0.28571        | 21        |
| chr12        | 115112133        | G        | T        | TBX3           | p.Ala516Asp        | c.1547C>A           | NM_005996.3           | 0        | 25        | 0.36364        | 11        |
| chr12        | 40499268         | G        | T        | SLC2A13        | p.Leu115Met        | c.343C>A            | NM_052885.3           | 0        | 25        | 0.28571        | 14        |
| chr12        | 49933258         | C        | A        | KCNH3          | p.Thr20Lys         | c.59C>A             | NM_012284.1           | 0        | 42        | 0.25           | 16        |
| chr12        | 57919442         | G        | T        | MBD6           | p.Ala231Ser        | c.691G>T            | NM_052897.3           | 0        | 49        | 0.20588        | 34        |
| chr12        | 88462350         | T        | G        | CEP290         | p.Lys2028Asn       | c.6084A>C           | NM_025114.3           | 0        | 32        | 0.32           | 50        |
| chr13        | 21563279         | A        | G        | LATS2          | p.Tyr214His        | c.640T>C            | NM_014572.2           | 0        | 59        | 0.28125        | 32        |
| chr13        | 21751298         | G        | T        | MRPL57         | p.Lys81Asn         | c.243G>T            | NM_024026.4           | 0        | 43        | 0.27273        | 11        |
| chr13        | 23912662         | G        | C        | SACS           | p.Pro1638Ala       | c.4912C>G           | NM_001278055.1        | 0        | 76        | 0.27941        | 68        |

|              |                  |          |          |                 |                     |                     |                       |          |            |                |            |
|--------------|------------------|----------|----------|-----------------|---------------------|---------------------|-----------------------|----------|------------|----------------|------------|
| chr14        | 100759349        | G        | T        | SLC25A29        | p.Gly61Gly          | c.183C>A            | NM_001039355.2        | 0        | 32         | 0.26667        | 15         |
| chr15        | 40648299         | G        | T        | PHGR1           | p.Gly15Val          | c.44G>T             | NM_001145643.1        | 0        | 16         | 0.28571        | 14         |
| chr16        | 31087999         | G        | T        | ZNF646          | p.Gln118His         | c.354G>T            | NM_014699.3           | 0        | 47         | 0.23529        | 17         |
| chr16        | 88502434         | G        | T        | ZNF469          | p.Leu2824Phe        | c.8472G>T           | NM_001127464.1        | 0        | 16         | 0.22222        | 18         |
| chr17        | 1373558          | G        | T        | MYO1C           | p.Arg813Ser         | c.2437C>A           | NM_001080779.1        | 0        | 33         | 0.21429        | 14         |
| <b>chr17</b> | <b>47583878</b>  | <b>G</b> | <b>T</b> | <b>NGFR</b>     | <b>p.Gln142His</b>  | <b>c.426G&gt;T</b>  | <b>NM_002507.3</b>    | <b>0</b> | <b>53</b>  | <b>0.2</b>     | <b>25</b>  |
| chr17        | 62496442         | G        | T        | DDX5            | p.Arg482Ser         | c.1444C>A           | NM_004396.3           | 0        | 37         | 0.25807        | 31         |
| chr17        | 79518087         | G        | T        | C17orf70        | p.Gln145Lys         | c.433C>A            | NM_025161.5           | 0        | 45         | 0.22727        | 22         |
| chr19        | 11526796         | G        | T        | RGL3            | p.Leu152Met         | c.454C>A            | NM_001035223.3        | 0        | 23         | 0.22222        | 18         |
| chr19        | 17323056         | G        | T        | MYO9B           | p.Lys2137Asn        | c.6411G>T           | NM_004145.3           | 0        | 41         | 0.2            | 15         |
| chr19        | 17417132         | G        | T        | MRPL34          | p.Gly75Cys          | c.223G>T            | NM_023937.3           | 0        | 21         | 0.36364        | 11         |
| chr19        | 36223009         | G        | T        | KMT2B           | p.Val1880Phe        | c.5638G>T           | NM_014727.2           | 0        | 40         | 0.25           | 16         |
| chr19        | 3942260          | G        | T        | NMRK2           | p.Asp233Tyr         | c.697G>T            | NM_001289117.1        | 0        | 17         | 0.2            | 15         |
| chr19        | 39804885         | G        | T        | LRFN1           | p.Asp364Glu         | c.1092C>A           | NM_020862.1           | 0        | 35         | 0.23529        | 17         |
| chr19        | 4446672          | G        | T        | UBXN6           | p.Gln196Lys         | c.586C>A            | NM_001171091.1        | 0        | 43         | 0.2            | 30         |
| chr19        | 5783461          | G        | T        | PRR22           | p.Ala266Glu         | c.797C>A            | NM_001134316.1        | 0        | 30         | 0.2            | 20         |
| chr19        | 6714015          | G        | T        | C3              | p.Thr254Asn         | c.761C>A            | NM_000064.2           | 0        | 73         | 0.21053        | 19         |
| chr2         | 101971729        | T        | G        | CREG2           | p.Gln237His         | c.711A>C            | NM_153836.3           | 0        | 120        | 0.2973         | 111        |
| chr2         | 110372773        | G        | T        | SOWAHC          | p.Gly236Val         | c.707G>T            | NM_023016.3           | 0        | 25         | 0.23077        | 13         |
| <b>chr2</b>  | <b>54856248</b>  | <b>G</b> | <b>T</b> | <b>SPTBN1</b>   | <b>p.Lys659Asn</b>  | <b>c.1977G&gt;T</b> | <b>NM_003128.2</b>    | <b>0</b> | <b>36</b>  | <b>0.2381</b>  | <b>21</b>  |
| chr22        | 25010759         | G        | T        | GGT1            | p.Gly61Cys          | c.181G>T            | NM_001288833.1        | 0        | 81         | 0.20408        | 49         |
| chr22        | 43539122         | C        | T        | MCAT            | p.Gly78Asp          | c.233G>A            | NM_014507.3           | 0        | 58         | 0.275          | 40         |
| chr3         | 127379851        | G        | T        | PODXL2          | p.Gly327Val         | c.980G>T            | NM_015720.3           | 0        | 57         | 0.25           | 28         |
| chr3         | 130714891        | G        | T        | ATP2C1          | p.Ala688Ser         | c.2062G>T           | NM_001001485.2        | 0        | 14         | 0.2            | 20         |
| <b>chr3</b>  | <b>187443366</b> | <b>G</b> | <b>T</b> | <b>BCL6</b>     | <b>p.Ala587Asp</b>  | <b>c.1760C&gt;A</b> | <b>NM_001130845.1</b> | <b>0</b> | <b>152</b> | <b>0.38843</b> | <b>121</b> |
| <b>chr4</b>  | <b>114276768</b> | <b>A</b> | <b>T</b> | <b>ANK2</b>     | <b>p.Ser2332Cys</b> | <b>c.6994A&gt;T</b> | <b>NM_001148.4</b>    | <b>0</b> | <b>70</b>  | <b>0.34043</b> | <b>47</b>  |
| <b>chr4</b>  | <b>23816205</b>  | <b>G</b> | <b>T</b> | <b>PPARGC1A</b> | <b>p.Pro301Thr</b>  | <b>c.901C&gt;A</b>  | <b>NM_013261.3</b>    | <b>0</b> | <b>55</b>  | <b>0.2</b>     | <b>20</b>  |
| chr4         | 3444801          | G        | T        | HGFAC           | p.Cys108Phe         | c.323G>T            | NM_001297439.1        | 0        | 79         | 0.2            | 15         |



|               |           |   |   |          |              |           |                |   |     |         |     |
|---------------|-----------|---|---|----------|--------------|-----------|----------------|---|-----|---------|-----|
| chr4          | 99950049  | A | T | METAP1   | p.Lys49Met   | c.146A>T  | NM_015143.2    | 0 | 82  | 0.23188 | 69  |
| chr5          | 171638865 | G | T | UBTD2    | p.Pro225His  | c.674C>A  | NM_152277.2    | 0 | 12  | 0.25    | 12  |
| chr5          | 180622225 | G | T | TRIM7    | p.Arg493Ser  | c.1477C>A | NM_203293.2    | 0 | 69  | 0.21739 | 23  |
| chr5          | 72744159  | G | T | FOXD1    | p.Ala10Asp   | c.29C>A   | NM_004472.2    | 0 | 55  | 0.2     | 20  |
| chr5          | 74696100  | A | T | COL4A3BP | p.Leu475*    | c.1424T>A | NM_001130105.1 | 0 | 67  | 0.26531 | 98  |
| chr6          | 17804631  | T | A | KIF13A   | p.Lys805Asn  | c.2415A>T | NM_001105566.2 | 0 | 125 | 0.27007 | 137 |
| chr6_qbl_hap6 | 2985262   | G | T | C6orf25  | p.Arg93Leu   | c.278G>T  | NM_025260.3.4  | 0 | 41  | 0.2     | 20  |
| chr7          | 103191602 | C | T | RELN     | p.Glu2072Lys | c.6214G>A | NM_005045.3    | 0 | 66  | 0.33333 | 48  |
| chr7          | 45122120  | G | T | NACAD    | p.Pro1220His | c.3659C>A | NM_001146334.1 | 0 | 27  | 0.23529 | 17  |
| chr7          | 48311783  | T | G | ABCA13   | p.Tyr840*    | c.2520T>G | NM_152701.4    | 0 | 20  | 0.41936 | 31  |
| chr8          | 144464621 | G | T | RHPN1    | p.Val605Phe  | c.1813G>T | NM_052924.2    | 0 | 44  | 0.36364 | 11  |
| chr8          | 144512441 | G | T | MAFA     | p.Pro46Thr   | c.136C>A  | NM_201589.3    | 0 | 28  | 0.3     | 10  |
| chrX          | 152686670 | C | A | ZFP92    | p.Leu279Ile  | c.835C>A  | NM_001136273.1 | 0 | 50  | 0.21053 | 19  |
| chrX          | 152721728 | T | C | HAUS7    | p.Thr244Ala  | c.730A>G  | NM_017518.7    | 0 | 39  | 0.2     | 20  |
| chrX          | 49104732  | G | T | CCDC22   | p.Glu391Asp  | c.1173G>T | NM_014008.4    | 0 | 40  | 0.28571 | 14  |

32

33

## VFN-D3

| Chr <sup>a</sup> | Position (hg19) | REF <sup>b</sup> | ALT <sup>c</sup> | Genesymbol | AA change <sup>d</sup> | DNA change <sup>e</sup> | Transcript     | Patient AF <sup>f</sup> | Patient Depth <sup>g</sup> | PDX AF <sup>f</sup> | PDX Depth <sup>g</sup> |
|------------------|-----------------|------------------|------------------|------------|------------------------|-------------------------|----------------|-------------------------|----------------------------|---------------------|------------------------|
| chr2             | 112615888       | C                | G                | ANAPC1     | p.Gln451His            | c.1353G>C               | NM_022662.3    | 0.0416667               | 24                         | 0.2                 | 55                     |
| chr4             | 77675883        | C                | T                | SHROOM3    | p.Thr1416Met           | c.4247C>T               | NM_020859.3    | 0.0054945               | 182                        | 0.36                | 400                    |
| chr10            | 97392772        | G                | T                | ALDH18A1   | p.Ala249Asp            | c.746C>A                | NM_001017423.1 | 0                       | 0                          | 0.37931             | 29                     |
| chr12            | 115118737       | C                | T                | TBX3       | p.Val202Ile            | c.604G>A                | NM_005996.3    | 0                       | 0                          | 0.46                | 50                     |
| chr14            | 59834210        | G                | A                | DAAM1      | p.Gly964Ser            | c.2890G>A               | NM_001270520.1 | 0                       | 0                          | 0.29032             | 31                     |
| chr17            | 59161917        | C                | G                | BCAS3      | p.Ala821Gly            | c.2462C>G               | NM_001099432.1 | 0                       | 0                          | 0.53571             | 28                     |
| chr22            | 23230373        | G                | A                | IGLL5      | p.Ser47Asn             | c.140G>A                | NM_001178126.1 | 0                       | 0                          | 0.96078             | 51                     |

|      |          |   |   |        |             |          |             |   |   |         |    |
|------|----------|---|---|--------|-------------|----------|-------------|---|---|---------|----|
| chr4 | 55129873 | A | G | PDGFRA | p.Tyr136Cys | c.407A>G | NM_006206.4 | 0 | 0 | 0.46316 | 95 |
|------|----------|---|---|--------|-------------|----------|-------------|---|---|---------|----|

34

35 <sup>a</sup>Chromosome; <sup>b</sup>Reference allele; <sup>c</sup>Alternative allele; <sup>d</sup>Amino-acid change; <sup>e</sup>DNA sequence change; <sup>f</sup>Allele frequency in patient's sample/PDX; <sup>g</sup>Read depth in  
36 patient's sample/PDX.

37 **Supplementary Table 6.** A complete list of protein coding variants which passed the filtering described in supplementary methods, that were found only in  
 38 the parental tumor samples and not the derived PDXs. Variants in genes of special interest based on a list of frequently mutated genes are highlighted in  
 39 red. Note, no protein coding variants were found only in the parental tumor for PDX model VFN-D3.  
 40  
 41

**VFN-D1**

| Chr <sup>a</sup> | Position (hg19) | REF <sup>b</sup> | ALT <sup>c</sup> | Genesymbol | AA change <sup>d</sup> | DNA change <sup>e</sup> | Transcript     | Patient AF <sup>f</sup> | Patient Depth <sup>g</sup> | PDX AF <sup>f</sup> | PDX Depth <sup>g</sup> |
|------------------|-----------------|------------------|------------------|------------|------------------------|-------------------------|----------------|-------------------------|----------------------------|---------------------|------------------------|
| chr13            | 23929290        | G                | T                | SACS       | p.Asp340Glu            | c.1020C>A               | NM_001278055.1 | 0.214286                | 14                         | 0                   | 0                      |
| chr2             | 240111695       | G                | T                | HDAC4      | p.Ser58*               | c.173C>A                | NM_006037.3    | 0.266667                | 15                         | 8                   | 0                      |
| chr2             | 241810063       | G                | T                | AGXT       | p.Ala121Ser            | c.361G>T                | NM_000030.2    | 0.272727                | 11                         | 0                   | 0                      |
| chr20            | 3641279         | G                | T                | GFRA4      | p.Asp177Glu            | c.531C>A                | NM_022139.3    | 0.3                     | 10                         | 0                   | 0                      |
| chr6             | 40360256        | G                | T                | LRFN2      | p.Pro599Gln            | c.1796C>A               | NM_020737.1    | 0.214286                | 14                         | 0                   | 0                      |
| chr8             | 38067946        | G                | T                | BAG4       | p.Ala401Ser            | c.1201G>T               | NM_001204878.1 | 0.230769                | 13                         | 0                   | 0                      |
| chrX             | 153041855       | G                | T                | PLXNB3     | p.Asp1615Tyr           | c.4843G>T               | NM_001163257.1 | 0.214286                | 14                         | 0                   | 0                      |
| chrX             | 71425705        | G                | T                | ERCC6L     | p.Ser971Tyr            | c.2912C>A               | NM_017669.2    | 0.230769                | 13                         | 0                   | 0                      |

42

43

**VFN-D2**

| Chr <sup>a</sup> | Position (hg19) | REF <sup>b</sup> | ALT <sup>c</sup> | Genesymbol | AA change <sup>d</sup> | DNA change <sup>e</sup> | Transcript     | Patient AF <sup>f</sup> | Patient Depth <sup>g</sup> | PDX AF <sup>f</sup> | PDX Depth <sup>g</sup> |
|------------------|-----------------|------------------|------------------|------------|------------------------|-------------------------|----------------|-------------------------|----------------------------|---------------------|------------------------|
| chr2             | 233709134       | G                | T                | GIGYF2     | p.Gly1052Val           | c.3155G>T               | NM_001103146.1 | 0.300752                | 133                        | 0                   | 0                      |
| chr10            | 27688070        | G                | T                | PTCHD3     | p.Ala486Glu            | c.1457C>A               | NM_001034842.3 | 0.2                     | 25                         | 0                   | 0                      |
| chr10            | 68687667        | A                | T                | LRRTM3     | p.Lys331Asn            | c.993A>T                | NM_178011.4    | 0.285714                | 63                         | 0                   | 0                      |
| chr10            | 73572290        | A                | T                | CDH23      | p.Gln905Leu            | c.2714A>T               | NM_001171933.1 | 0.287671                | 73                         | 0                   | 0                      |
| chr11            | 60233410        | TAATGA           | T                | MS4A1      | p.Ile118fs             | c.354_358delAATGA       | NM_021950.3    | 0.339286                | 56                         | 0                   | 0                      |

|              |                 |          |          |               |                    |                     |                    |              |            |          |          |
|--------------|-----------------|----------|----------|---------------|--------------------|---------------------|--------------------|--------------|------------|----------|----------|
| <b>chr11</b> | 94326718        | C        | A        | PIWIL4        | p.Pro354His        | c.1061C>A           | NM_152431.2        | 0.461538     | 117        | 0        | 0        |
| <b>chr13</b> | 113508670       | A        | G        | ATP11A        | p.Lys690Arg        | c.2069A>G           | NM_015205.2        | 0.343434     | 99         | 0        | 0        |
| <b>chr13</b> | 33017810        | A        | T        | N4BP2L2       | p.Asp273Glu        | c.819T>A            | NM_001278432.1     | 0.422764     | 123        | 0        | 0        |
| <b>chr14</b> | 24724652        | C        | G        | TGM1          | p.Lys521Asn        | c.1563G>C           | NM_000359.2        | 0.348404     | 376        | 0        | 0        |
| <b>chr15</b> | 42434825        | G        | A        | PLA2G4F       | p.Arg744Cys        | c.2230C>T           | NM_213600.3        | 0.360294     | 136        | 0        | 0        |
| <b>chr15</b> | 86225395        | G        | T        | AKAP13        | p.Arg325Leu        | c.974G>T            | NM_001270546.1     | 0.345679     | 81         | 0        | 0        |
| <b>chr18</b> | 7038814         | C        | A        | LAMA1         | p.Gly520Cys        | c.1558G>T           | NM_005559.3        | 0.238806     | 67         | 0        | 0        |
| <b>chr19</b> | 39665657        | G        | A        | PAK4          | p.Met395Ile        | c.1185G>A           | NM_001014831.2     | 0.327869     | 244        | 0        | 0        |
| <b>chr20</b> | <b>30309616</b> | <b>T</b> | <b>G</b> | <b>BCL2L1</b> | <b>p.Asn136His</b> | <b>c.406A&gt;C</b>  | <b>NM_138578.1</b> | <b>0.344</b> | <b>125</b> | <b>0</b> | <b>0</b> |
| <b>chr3</b>  | 42676723        | C        | A        | NKTR          | p.Thr343Lys        | c.1028C>A           | NM_005385.3        | 0.358491     | 53         | 0        | 0        |
| <b>chr4</b>  | 90743452        | C        | A        | SNCA          | p.Gly84Val         | c.251G>T            | NM_000345.3        | 0.311111     | 270        | 0        | 0        |
| <b>chr5</b>  | 137426581       | G        | A        | WNT8A         | p.Arg310His        | c.929G>A            | NM_001300938.1     | 0.328063     | 253        | 0        | 0        |
| <b>chr5</b>  | 178417671       | T        | C        | GRM6          | p.Lys312Glu        | c.934A>G            | NM_000843.3        | 0.285714     | 77         | 0        | 0        |
| <b>chr5</b>  | 26881552        | A        | C        | CDH9          | p.Leu688Arg        | c.2063T>G           | NM_016279.3        | 0.327869     | 122        | 0        | 0        |
| <b>chr5</b>  | 74450146        | C        | T        | ANKRD31       | p.Gly578Arg        | c.1732G>A           | NM_001164443.1     | 0.369863     | 73         | 0        | 0        |
| <b>chr7</b>  | 95024002        | T        | A        | PON3          | p.Glu33Asp         | c.99A>T             | NM_000940.2        | 0.266187     | 139        | 0        | 0        |
| <b>chr8</b>  | 18729679        | A        | G        | PSD3          | p.Ile232Thr        | c.695T>C            | NM_015310.3        | 0.225806     | 62         | 0        | 0        |
| <b>chr9</b>  | 37327819        | GTATCACC | G        | ZCCHC7        | p.Tyr326fs         | c.976_982delTATCACC | NM_001289119.1     | 0.304348     | 115        | 0        | 0        |
| <b>chrX</b>  | 102931875       | G        | T        | MORF4L2       | p.Ser27Arg         | c.81C>A             | NM_001142418.1     | 0.2          | 15         | 0        | 0        |
| <b>chrX</b>  | 21755733        | T        | C        | SMPX          | p.Glu72Gly         | c.215A>G            | NM_014332.2        | 0.813559     | 59         | 0        | 0        |

44

45 <sup>a</sup>Chromosome; <sup>b</sup>Reference allele; <sup>c</sup>Alternative allele; <sup>d</sup>Amino-acid change; <sup>e</sup>DNA sequence change; <sup>f</sup>Allele frequency in patient's sample/PDX; <sup>g</sup>Read depth in  
46 patient's sample/PDX.

47 **Supplementary Table 7.** Statistical significance of effects of compounds on tumor volume in *in vivo*  
 48 models. Table shows P-values of partial t-tests about zero slope of mean tumor volume differences.  
 49

| Differences                         | TMD 8    | VFN-D1              | VFN-D2   | VFN-D3   |
|-------------------------------------|----------|---------------------|----------|----------|
| vehicle vs. AQX-435                 | 0.0000** | 0.0040*             | 0.0001** | 0.0000** |
| vehicle vs. ibrutinib               | 0.0000** | 0.0064              | 0.4465   | 0.0573   |
| vehicle vs. ibrutinib and AQX-435   | N/A      | 0.0000**            | 0.0000** | 0.0000** |
| ibrutinib vs. AQX-435               | 0.5538   | 0.4629 <sup>+</sup> | 0.0004** | 0.0017*  |
| AQX-435 vs. ibrutinib and AQX-435   | N/A      | 0.0000**            | 0.7029   | 0.0016*  |
| ibrutinib vs. ibrutinib and AQX-435 | N/A      | 0.0001**            | 0.0001** | 0.0000** |

50  
 51 \*Statistically significant difference at the 10% simultaneous significance level. \*\*Statistically  
 52 significant difference at the 1% simultaneous significance level. <sup>+</sup>Non-significant negative slope. N/A,  
 53 not applicable.  
 54

55 **Supplementary Fig. 1.** SHIP1 expression and phosphorylation. Immunoblot analysis was performed  
 56 to quantify SHIP1 expression and phosphorylation (Y<sup>1022</sup>) in snap-frozen pellets from fresh CLL  
 57 samples. Total SHIP1 and phospho-SHIP1 was normalized to HSC70 expression with values for RL  
 58 cells (positive control) set to 1.0. Graphs show SHIP1 expression or phosphorylation relative to *IGHV*  
 59 mutation status, sIgM signaling capacity and expression of CD38, CD49d or ZAP70. Results of  
 60 statistical comparisons are shown (Mann-Whitney test for U- versus M-CLL, otherwise Pearson's  
 61 correlation analysis).  
 62  
 63

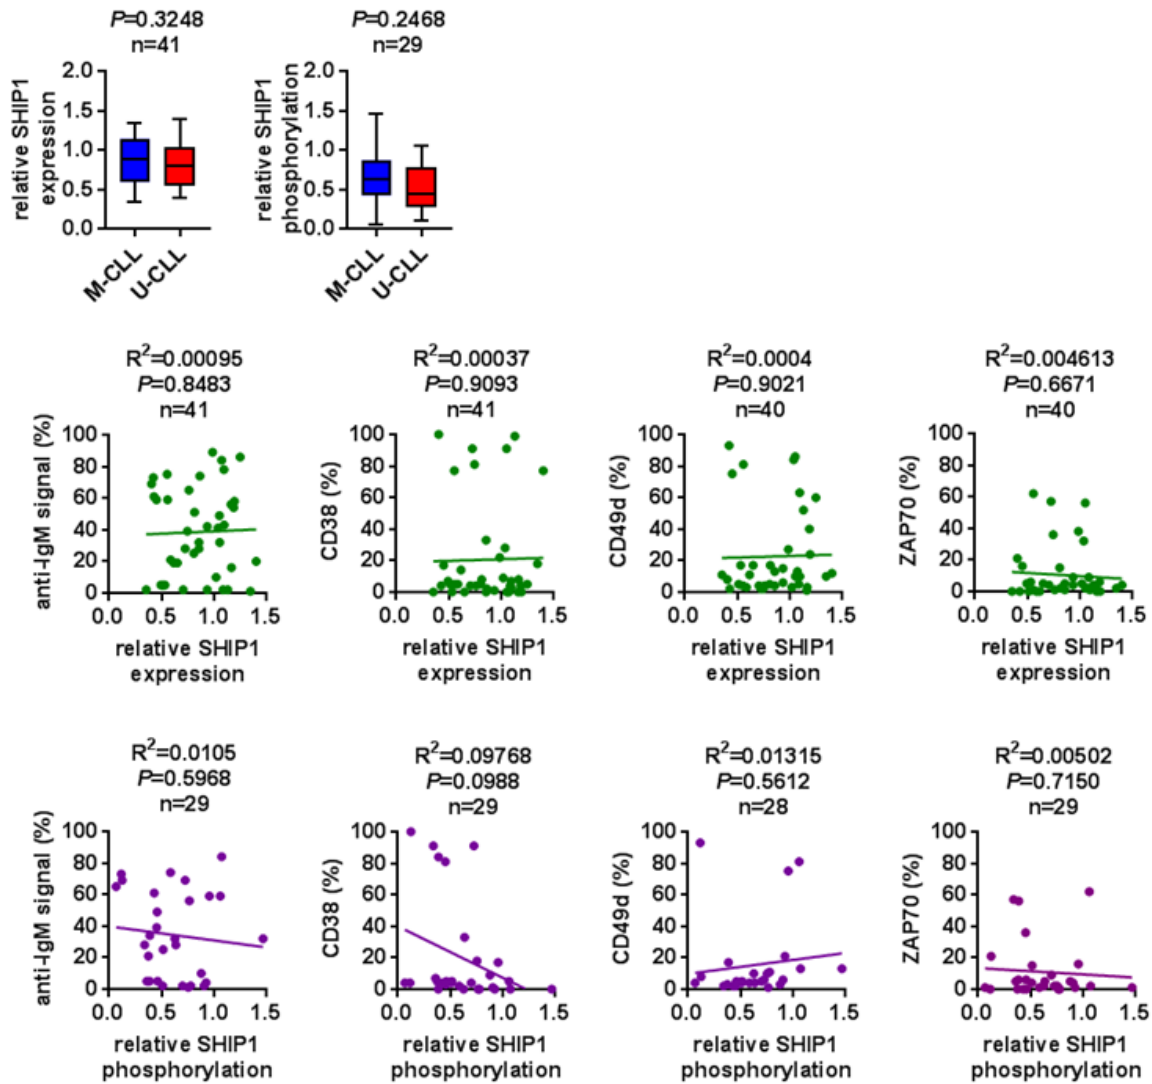

64  
 65

66 **Supplementary Fig. 2.** Effect of anti-IgM on SHIP1 phosphorylation. Anti-IgM signaling responsive  
 67 CLL samples were treated with control antibodies, or anti-IgM for the indicated times and expression  
 68 of total and phospho-SHIP1 was analyzed by immunoblotting. Graphs show mean ( $\pm$ SD) SHIP1  
 69 phosphorylation with values for control cells set to 1.0 for **A**, soluble (n=7) and **B**, immobilized (n=8)  
 70 antibodies. **C**, Analysis of effects of anti-IgM or control (C) antibodies on SHIP1 phosphorylation in  
 71 two anti-IgM signaling non-responsive samples. Numbers under the blots show quantitation of  
 72 SHIP1 phosphorylation relative to control antibody (5 minutes)-treated cells.  
 73

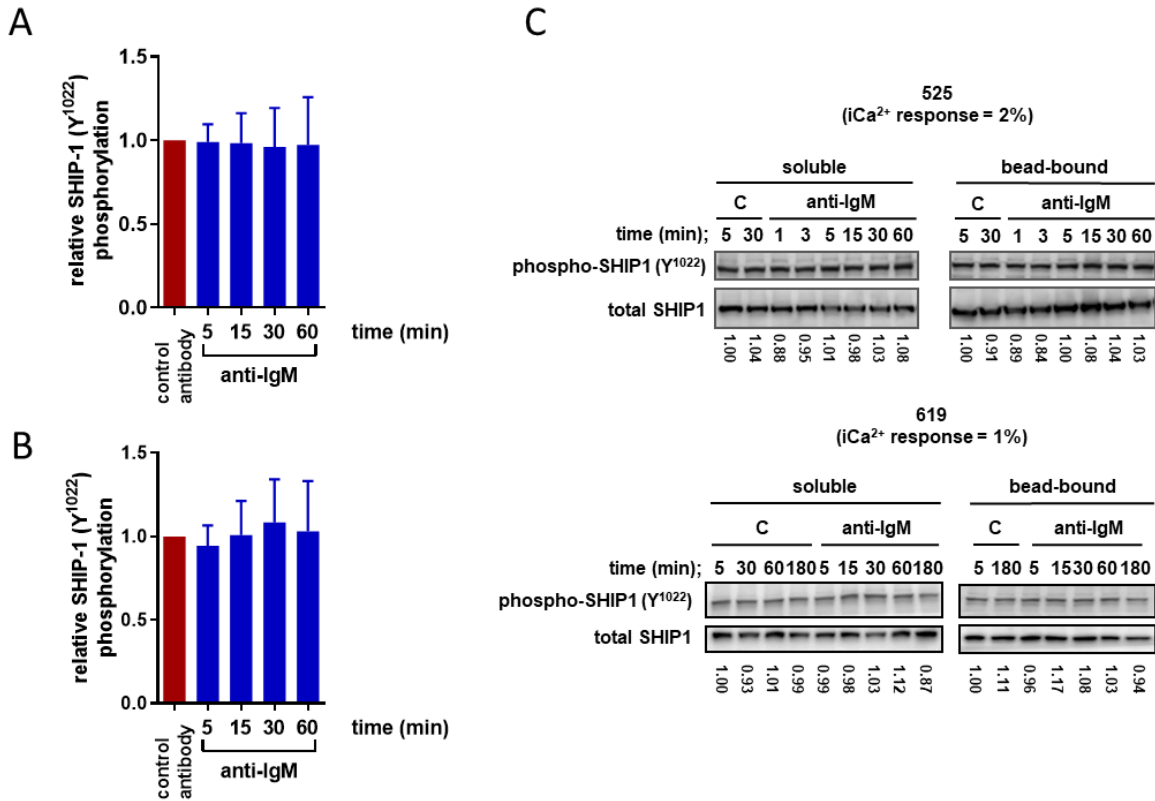

74  
 75  
 76  
 77  
 78

79 **Supplementary Fig. 3.** Structure of SHIP1 activator. The figure shows the structure of the natural  
80 product SHIP1 activator pelorol, its closely related analogue MN100 and AQX-435. Shown below are  
81 the calculated logP (clogP) values which provide a comparative measure of the compounds'  
82 lipophilicities. clogP values were calculated using ChemDraw Professional (Perkin Elmer).

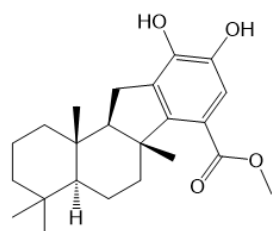

pelorol  
clogP 7.50

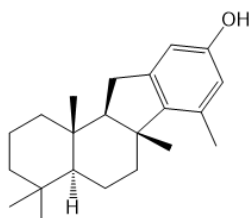

AQX-MN100  
clogP 7.93

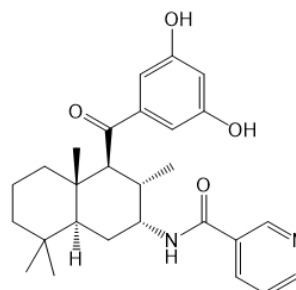

AQX-435  
clogP 5.85

83



84 **Supplementary Fig. 4.** Comparison between AQX-435 and idelalisib for effects on AKT S<sup>473</sup>  
85 phosphorylation. CLL samples (n=9) were pre-treated with the indicated concentrations of AQX-435  
86 or idelalisib, or DMSO as a control, for 30 minutes and then stimulated with bead-bound anti-IgM or  
87 control antibody. Graph shows mean ( $\pm$ SD) S<sup>473</sup> AKT phosphorylation with values for control  
88 antibody/DMSO-treated cells set to 1.0 and the statistical significance of the indicated differences  
89 (Student's t-test).  
90

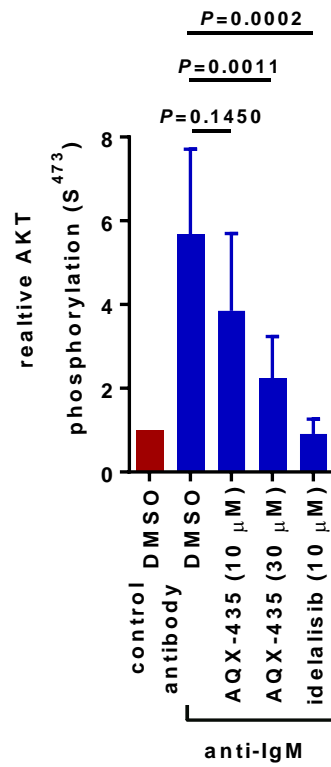

91

92 **Supplementary Fig. 5.** Effect of AQX-435 on anti-IgD-induced signalling. CLL samples were pre-  
 93 treated with the indicated concentrations of AQX-435 or DMSO (D) as a control for 30 minutes and  
 94 then stimulated with bead-bound anti-IgD or control antibody (ab) for 30 minutes. Figure shows **A**,  
 95 representative immunoblot analysis for phosphorylation of AKT S<sup>473</sup>, total AKT and  $\beta$ -actin as an  
 96 additional loading control. **B**, Quantitation of AKT S<sup>473</sup> phosphorylation for all samples analysed  
 97 (n=3). Graph shows mean ( $\pm$ SD) AKT S<sup>473</sup> phosphorylation with values for control antibody/DMSO-  
 98 treated cells (C) set to 1.0.

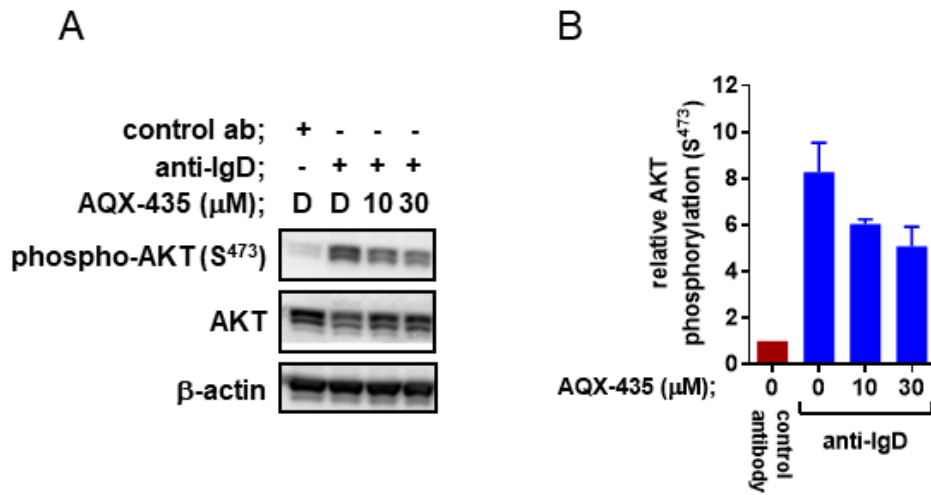

99

100 **Supplementary Fig. 6.** Effect of AQX-435 on anti-IgM-induced intracellular  $Ca^{2+}$  mobilization, sIgM  
 101 expression and SHIP1 phosphorylation. **A** and **B**, CLL samples were pre-treated with AQX-435 (30  
 102  $\mu$ M) or idelalisib (10  $\mu$ M), or left untreated as a control for 30 minutes. Cells were then incubated  
 103 with the  $Ca^{2+}$ -sensitive probe Fluo3-AM (FluoroPure Grade, Life Technologies), in the continued  
 104 presence of AQX-435/idelalisib for an additional 30 minutes before analysis using flow cytometry.  
 105 "Baseline" data was collected for  $\sim$ 30 seconds before addition of anti-IgM. **A**, Representative results  
 106 (percentage of responding cells). **B**, Quantitation for all samples analyzed (n=3 for both). Graph  
 107 shows mean ( $\pm$ SD)  $iCa^{2+}$  mobilization in AQX-435 or idelalisib-treated cells relative to control anti-  
 108 IgM-treated cells (set to 100%). **C**, CLL samples were treated with AQX-435 (30  $\mu$ M) or DMSO for 6  
 109 hours. Samples were stained with pacific blue-conjugated anti-CD19, PerCP-Cy5.5-conjugated anti-  
 110 CD5 and PE-conjugated anti-surface IgM (Biolegend) in duplicate and fluorescence quantified by flow  
 111 cytometry. Graphs show sIgM expression in  $CD5^+CD19^+$  cells for AQX-435 (red) or DMSO (blue)  
 112 treated cells. The solid grey histogram shows staining of cells with a PE-conjugated mIgG2a isotype  
 113 control antibody (Biolegend). Figure shows results for 2 samples and is representative of a total of 5  
 114 samples analyzed. **D**, CLL samples (n=4) were treated with AQX-435 (10 or 30  $\mu$ M) for 2 hours and  
 115 then expression of total/phospho-SHIP1 was analyzed by immunoblotting. Graph shows mean ( $\pm$ SD)  
 116 SHIP1 phosphorylation in AQX-435-treated cells relative to DMSO-treated cells (set to 1.0).  
 117  
 118

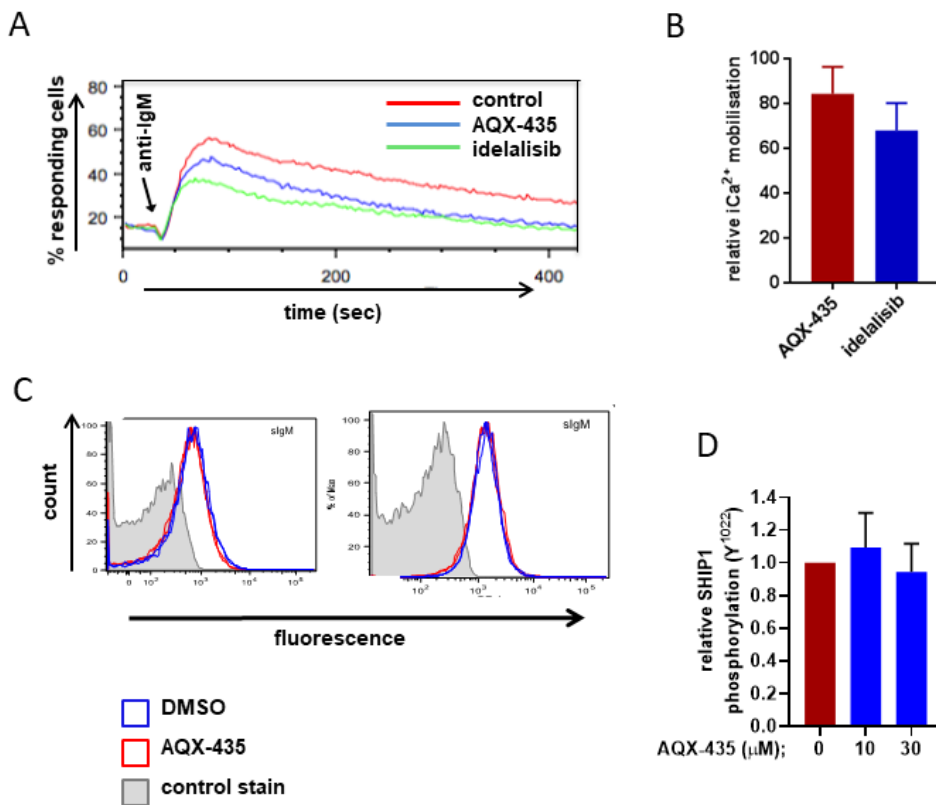

119

120

121 **Supplementary Fig. 7.** AQX-435 does not alter ibrutinib-mediated inhibition of calcium signaling. CLL  
 122 samples (n=2) were pre-treated with AQX-435 (30  $\mu$ M) and/or ibrutinib (100 nM), or DMSO as a  
 123 control, for 30 minutes. **A**, Cells were then stimulated with bead-bound anti-IgM or control antibody  
 124 for 15 minutes and expression of total/phospho-PLC $\gamma$ 2 was analyzed by immunoblotting. HSC70 was  
 125 analyzed as an additional loading control. **B**, Drug-treated cells were incubated with the Ca<sup>2+</sup>-  
 126 sensitive probe Fluo3-AM 30 minutes before analysis using flow cytometry. "Baseline" data was  
 127 collected for ~30 seconds before addition of anti-IgM. Graphs show percentage of responding cells.  
 128

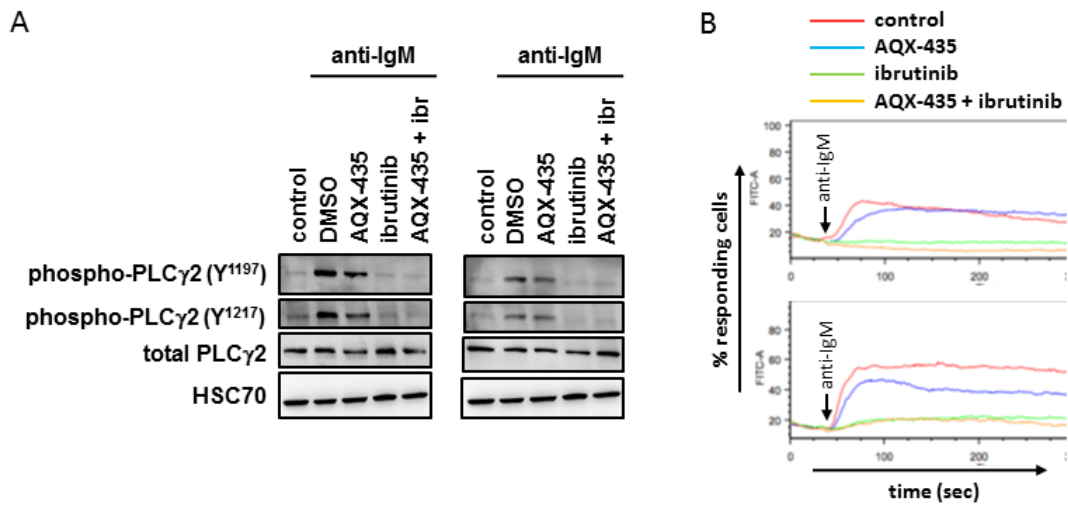

129

130 **Supplementary Fig. 8.** AQX-435-induced apoptosis in CLL samples. CLL samples were treated with  
 131 various concentrations of AQX-435 (5–30  $\mu\text{M}$ ), idelalisib (1–10  $\mu\text{M}$ ) or DMSO as a control. After 24  
 132 hours, the proportion of viable (annexin V/PI<sup>+</sup>) cells was determined using annexin V/PI staining.  
 133 Results were normalized to values for DMSO-treated cells (set to 100% for each sample). **A**, Effect of  
 134 AQX-435 in 24 samples was compared across disease subsets defined by *IGHV* mutation status, sIgM  
 135 signaling capacity and expression of CD38, CD49d or ZAP70 (using cut-offs of 30%, 30% and 20%,  
 136 respectively) (18–21). Graphs show means ( $\pm\text{SD}$ ) and the statistical significance of differences  
 137 between groups at each concentration (Student's t-test). Where values are not shown,  $P>0.05$ . **B**,  
 138 Comparison of effects of AQX-435 and idelalisib in 3 samples (mean ( $\pm\text{SD}$ ) percentage of viable cells).  
 139  
 140

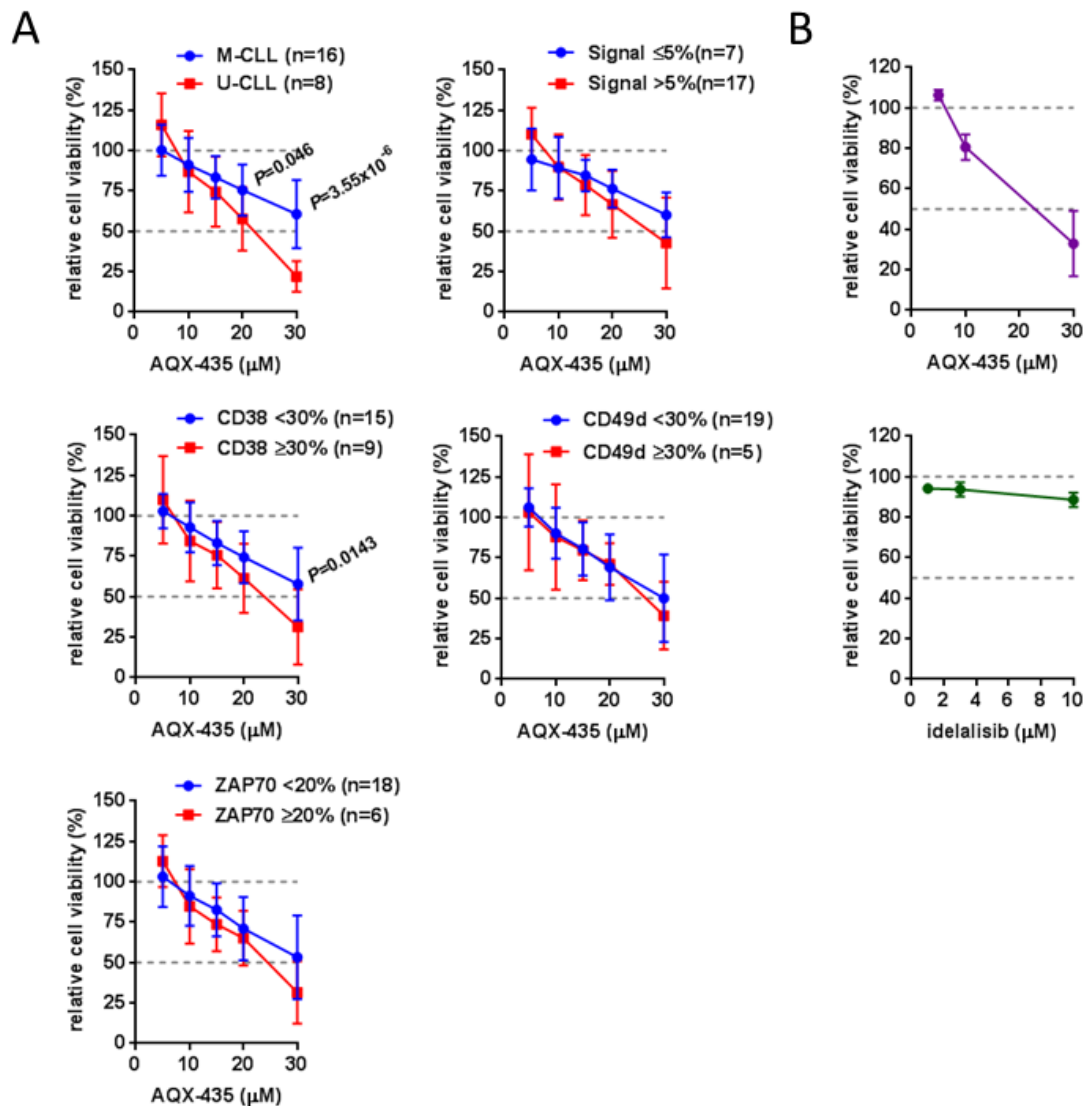

141

142 **Supplementary Fig. 9.** Inhibition of anti-IgM-induced AKT phosphorylation in WSU-FSCCL cells.  
 143 WSU-FSCCL cells were pre-treated with AQX-435 or DMSO as a control for 1 hour and then  
 144 incubated with soluble anti-IgM or control antibody for 15 minutes at 37 °C. Expression of total and  
 145 phospho-AKT (S<sup>473</sup>) was analyzed by immunoblotting. Experiment is representative of two separate  
 146 experiments.  
 147

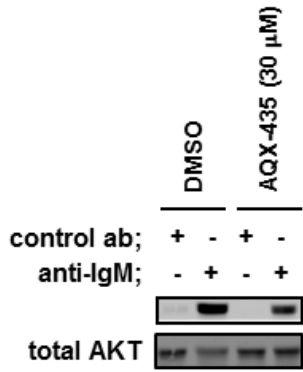

148

149 **Supplementary Fig. 10.** Effect of AQX-435 on TMD8 cell viability *in vitro* and on mouse weight and  
 150 AKT phosphorylation *in vivo*. **A**, TMD8 cells were incubated with the indicated concentrations of  
 151 AQX-435 for 72 hours and cell viability was determined by annexin V/PI staining and flow cytometry.  
 152 Graph shows mean ( $\pm$ SD) percentage of viable (annexin V/PI<sup>-</sup>) cells derived from three independent  
 153 experiments relative to DMSO control (set to 100%). **B**, Relative mouse weight during treatment  
 154 with vehicle control, AQX-435 (10 mg/kg, ip) or ibrutinib (25 mg/kg po). Graph shows mean ( $\pm$ SD)  
 155 with day 0 values set to 100. **C**, Immunoblot analysis of phospho-AKT (S<sup>473</sup>), total AKT and HSC70 in  
 156 TMD8 tumors resected from mice treated with vehicle or AQX-435 for 5 days. Note we were unable  
 157 to obtain intact protein from one tumor from the AQX-435-treated mice.  
 158

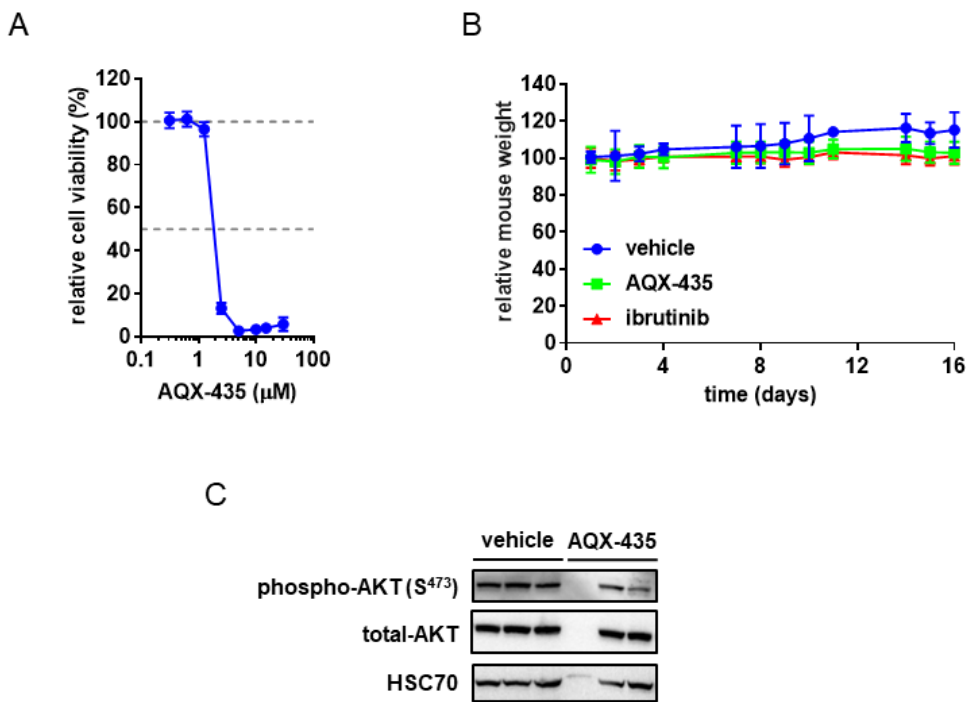

159

160 **Supplementary Fig. 11.** Characterization of DLBCL PDX models. **A**, Karyotype diagram charts showing  
 161 the copy number variation as calculated by CNVkit in the parental sample (left chromosomes) and  
 162 the derived PDX model (right chromosomes). Inferred segmental changes are marked in shades of  
 163 blue (loss) and red (gain). **B**, Stacked bar charts showing numbers of common protein coding variants  
 164 in both the parental tumor sample and the PDX, and those gained or lost in the PDX model. **C**,  
 165 Scatter plots showing the allele frequency of common protein coding variants in each PDX model  
 166 sample compared to its matched parental tumor. Variants in genes of special interest based on a list  
 167 of frequently mutated genes described in the supplemental methods are highlighted in red  
 168

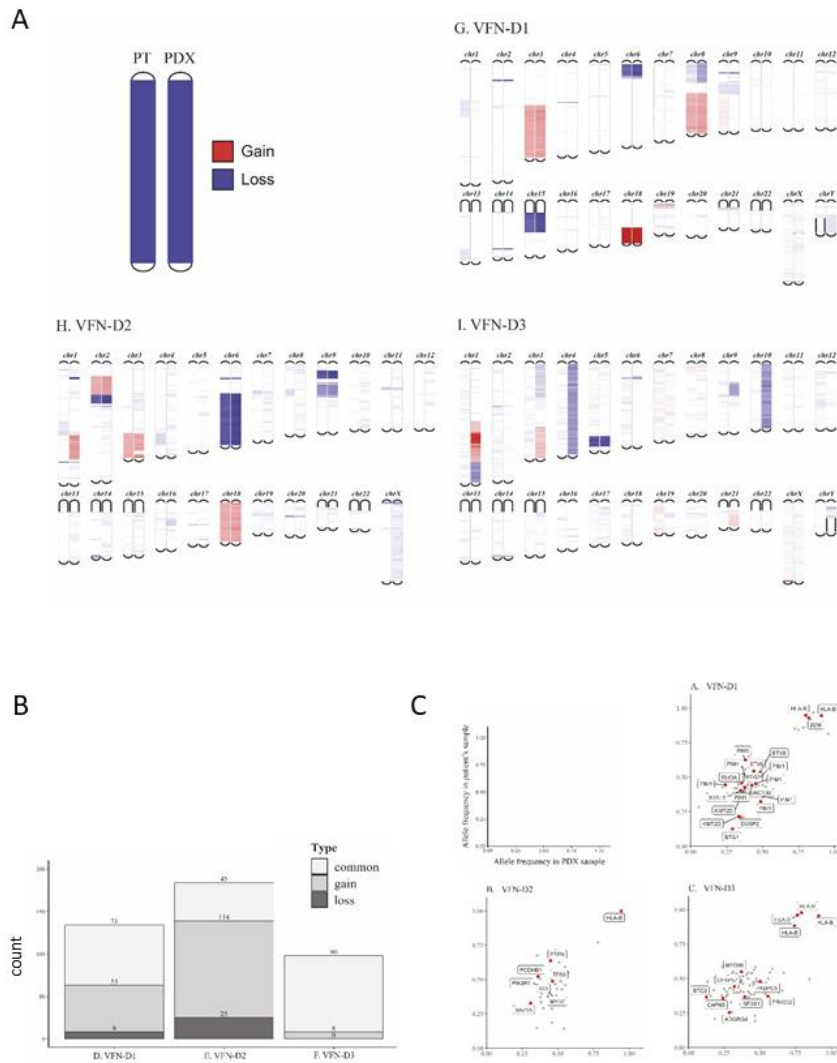

169

170



171 **Supplementary Fig. 12.** Effects of combined treated with AQX-435 and ibrutinib in PDX models. Mice  
172 bearing DLBCL PDX tumors were treated with AQX-435, ibrutinib or the combination of AQX-435 and  
173 ibrutinib. Graphs show relative mouse weight (mean  $\pm$ SD) during treatment with day 0 values set to  
174 100.  
175

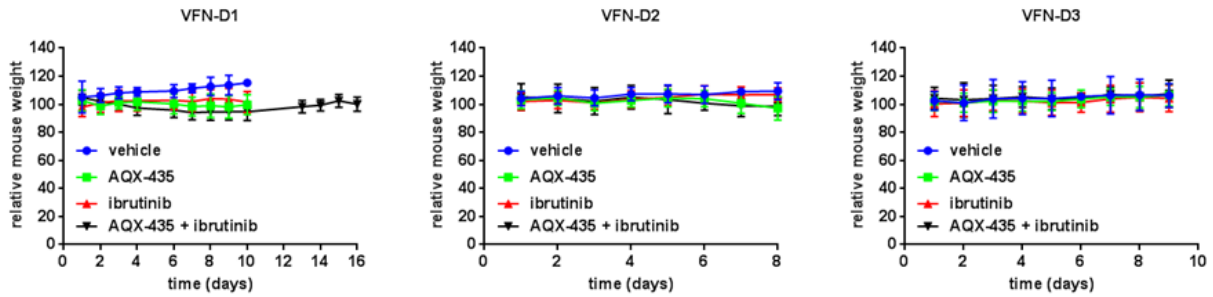

176

177

- 178 1. Klanova M, Soukup T, Jaksa R, Molinsky J, Lateckova L, Maswabi BC, *et al.* Mouse models of  
179 mantle cell lymphoma, complex changes in gene expression and phenotype of engrafted  
180 MCL cells: implications for preclinical research. *Lab Invest* **2014**;94(7):806-17 doi  
181 10.1038/labinvest.2014.61.
- 182 2. Li H, Durbin R. Fast and accurate short read alignment with Burrows-Wheeler transform.  
183 *Bioinformatics* **2009**;25(14):1754-60 doi 10.1093/bioinformatics/btp324.
- 184 3. Li H, Handsaker B, Wysoker A, Fennell T, Ruan J, Homer N, *et al.* The Sequence  
185 Alignment/Map format and SAMtools. *Bioinformatics* **2009**;25(16):2078-9 doi  
186 10.1093/bioinformatics/btp352.
- 187 4. Koboldt DC, Zhang Q, Larson DE, Shen D, McLellan MD, Lin L, *et al.* VarScan 2: somatic  
188 mutation and copy number alteration discovery in cancer by exome sequencing. *Genome*  
189 *research* **2012**;22(3):568-76 doi 10.1101/gr.129684.111.
- 190 5. Cingolani P, Patel VM, Coon M, Nguyen T, Land SJ, Ruden DM, *et al.* Using *Drosophila*  
191 *melanogaster* as a Model for Genotoxic Chemical Mutational Studies with a New Program,  
192 SnpSift. *Frontiers in genetics* **2012**;3:35 doi 10.3389/fgene.2012.00035.
- 193 6. Pasqualucci L, Dalla-Favera R. Genetics of diffuse large B-cell lymphoma. *Blood*  
194 **2018**;131(21):2307-19 doi 10.1182/blood-2017-11-764332.
- 195 7. Reddy A, Zhang J, Davis NS, Moffitt AB, Love CL, Waldrop A, *et al.* Genetic and Functional  
196 Drivers of Diffuse Large B Cell Lymphoma. *Cell* **2017**;171(2):481-94 e15 doi  
197 10.1016/j.cell.2017.09.027.
- 198 8. Dubois S, Viailly PJ, Mareschal S, Bohers E, Bertrand P, Ruminy P, *et al.* Next-Generation  
199 Sequencing in Diffuse Large B-Cell Lymphoma Highlights Molecular Divergence and  
200 Therapeutic Opportunities: a LYSA Study. *Clin Cancer Res* **2016**;22(12):2919-28 doi  
201 10.1158/1078-0432.CCR-15-2305.
- 202 9. Karube K, Enjuanes A, Dlouhy I, Jares P, Martin-Garcia D, Nadeu F, *et al.* Integrating genomic  
203 alterations in diffuse large B-cell lymphoma identifies new relevant pathways and potential  
204 therapeutic targets. *Leukemia* **2018**;32(3):675-84 doi 10.1038/leu.2017.251.
- 205 10. Pasqualucci L, Trifonov V, Fabbri G, Ma J, Rossi D, Chiarenza A, *et al.* Analysis of the coding  
206 genome of diffuse large B-cell lymphoma. *Nat Genet* **2011**;43(9):830-7 doi 10.1038/ng.892.
- 207 11. Zhang J, Grubor V, Love CL, Banerjee A, Richards KL, Mieczkowski PA, *et al.* Genetic  
208 heterogeneity of diffuse large B-cell lymphoma. *Proc Natl Acad Sci U S A* **2013**;110(4):1398-  
209 403 doi 10.1073/pnas.1205299110.
- 210 12. Lohr JG, Stojanov P, Lawrence MS, Auclair D, Chapuy B, Sougnez C, *et al.* Discovery and  
211 prioritization of somatic mutations in diffuse large B-cell lymphoma (DLBCL) by whole-exome  
212 sequencing. *Proc Natl Acad Sci U S A* **2012**;109(10):3879-84 doi 10.1073/pnas.1121343109.
- 213 13. Morin RD, Mendez-Lago M, Mungall AJ, Goya R, Mungall KL, Corbett RD, *et al.* Frequent  
214 mutation of histone-modifying genes in non-Hodgkin lymphoma. *Nature*  
215 **2011**;476(7360):298-303 doi 10.1038/nature10351.
- 216 14. Talevich E, Shain AH, Botton T, Bastian BC. CNVkit: Genome-Wide Copy Number Detection  
217 and Visualization from Targeted DNA Sequencing. *PLoS computational biology*  
218 **2016**;12(4):e1004873 doi 10.1371/journal.pcbi.1004873.
- 219 15. Tibshirani R, Wang P. Spatial smoothing and hot spot detection for CGH data using the fused  
220 lasso. *Biostatistics* **2008**;9(1):18-29 doi 10.1093/biostatistics/kxm013.
- 221 16. Mockridge CI, Potter KN, Wheatley I, Neville LA, Packham G, Stevenson FK. Reversible anergy  
222 of IgM-mediated signaling in the two subsets of CLL defined by VH-gene mutational status.  
223 *Blood* **2007**;109(10):4424-31 doi blood-2006-11-056648 [pii] 10.1182/blood-2006-11-  
224 056648.
- 225 17. Hans CP, Weisenburger DD, Greiner TC, Gascoyne RD, Delabie J, Ott G, *et al.* Confirmation of  
226 the molecular classification of diffuse large B-cell lymphoma by immunohistochemistry using  
227 a tissue microarray. *Blood* **2004**;103(1):275-82 doi 10.1182/blood-2003-05-1545.

- 228 18. Damle RN, Wasil T, Fais F, Ghiotto F, Valetto A, Allen SL, *et al.* Ig V gene mutation status and  
229 CD38 expression as novel prognostic indicators in chronic lymphocytic leukemia. *Blood*  
230 **1999**;94(6):1840-7.
- 231 19. Zucchetto A, Bomben R, Dal Bo M, Sonogo P, Nanni P, Rupolo M, *et al.* A scoring system  
232 based on the expression of six surface molecules allows the identification of three  
233 prognostic risk groups in B-cell chronic lymphocytic leukemia. *J Cell Physiol* **2006**;207(2):354-  
234 63 doi 10.1002/jcp.20570.
- 235 20. Orchard JA, Ibbotson RE, Davis Z, Wiestner A, Rosenwald A, Thomas PW, *et al.* ZAP-70  
236 expression and prognosis in chronic lymphocytic leukaemia. *Lancet* **2004**;363(9403):105-11  
237 doi 10.1016/S0140-6736(03)15260-9.
- 238 21. Rassenti LZ, Huynh L, Toy TL, Chen L, Keating MJ, Gribben JG, *et al.* ZAP-70 compared with  
239 immunoglobulin heavy-chain gene mutation status as a predictor of disease progression in  
240 chronic lymphocytic leukemia. *N Engl J Med* **2004**;351(9):893-901 doi  
241 10.1056/NEJMoa040857.  
242
